# Supplementary material for: Sex and age differences in clinically significant symptoms of depression and anxiety among people in Australia in the first month of COVID-19 restrictions: a national survey
Source: PubMed Central journal article supplement — BMJ Open. 2020 Nov 24;10(11):e042696. doi: 10.1136/bmjopen-2020-042696 (PMC7688441; doi:10.1136/bmjopen-2020-042696), 2020-11-24
Supplement: bmjopen-2020-042696.draft_revisions.pdf [file bmjopen-2020-042696.draft_revisions.pdf]

# BMJ Open

BMJ Open is committed to open peer review. As part of this commitment we make the peer review history of every article we publish publicly available.

When an article is published we post the peer reviewers' comments and the authors' responses online. We also post the versions of the paper that were used during peer review. These are the versions that the peer review comments apply to.

The versions of the paper that follow are the versions that were submitted during the peer review process. They are not the versions of record or the final published versions. They should not be cited or distributed as the published version of this manuscript.

BMJ Open is an open access journal and the full, final, typeset and author-corrected version of record of the manuscript is available on our site with no access controls, subscription charges or pay-per-view fees (<http://bmjopen.bmj.com>).

If you have any questions on BMJ Open's open peer review process please email [info.bmjopen@bmj.com](mailto:info.bmjopen@bmj.com)

# BMJ Open

## Sex and age differences in clinically significant symptoms of depression and anxiety among people in Australia in the first month of COVID-19 restrictions: A national survey

|                               |                                                                                                                                                                                                                                                                                                                                                                                                                                          |
|-------------------------------|------------------------------------------------------------------------------------------------------------------------------------------------------------------------------------------------------------------------------------------------------------------------------------------------------------------------------------------------------------------------------------------------------------------------------------------|
| Journal:                      | <i>BMJ Open</i>                                                                                                                                                                                                                                                                                                                                                                                                                          |
| Manuscript ID                 | bmjopen-2020-042696                                                                                                                                                                                                                                                                                                                                                                                                                      |
| Article Type:                 | Original research                                                                                                                                                                                                                                                                                                                                                                                                                        |
| Date Submitted by the Author: | 14-Jul-2020                                                                                                                                                                                                                                                                                                                                                                                                                              |
| Complete List of Authors:     | Hammarberg, Karin; Monash University, School of Public Health and Preventative Medicine<br>Tran, Thach; Monash University, Global and Women's Health, School of Public Health and Preventive Medicine<br>Kirkman, Maggie; Monash University, Jean Hailes Research Unit, School of Public Health and Preventive Medicine<br>Fisher, Jane; Monash University, Jean Hailes Research Unit, School of Public Health and Preventative Medicine |
| Keywords:                     | MENTAL HEALTH, PUBLIC HEALTH, SOCIAL MEDICINE                                                                                                                                                                                                                                                                                                                                                                                            |
|                               |                                                                                                                                                                                                                                                                                                                                                                                                                                          |

SCHOLARONE™  
Manuscripts

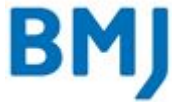

I, the Submitting Author has the right to grant and does grant on behalf of all authors of the Work (as defined in the below author licence), an exclusive licence and/or a non-exclusive licence for contributions from authors who are: i) UK Crown employees; ii) where BMJ has agreed a CC-BY licence shall apply, and/or iii) in accordance with the terms applicable for US Federal Government officers or employees acting as part of their official duties; on a worldwide, perpetual, irrevocable, royalty-free basis to BMJ Publishing Group Ltd ("BMJ") its licensees and where the relevant Journal is co-owned by BMJ to the co-owners of the Journal, to publish the Work in this journal and any other BMJ products and to exploit all rights, as set out in our [licence](#).

The Submitting Author accepts and understands that any supply made under these terms is made by BMJ to the Submitting Author unless you are acting as an employee on behalf of your employer or a postgraduate student of an affiliated institution which is paying any applicable article publishing charge ("APC") for Open Access articles. Where the Submitting Author wishes to make the Work available on an Open Access basis (and intends to pay the relevant APC), the terms of reuse of such Open Access shall be governed by a Creative Commons licence – details of these licences and which [Creative Commons](#) licence will apply to this Work are set out in our licence referred to above.

Other than as permitted in any relevant BMJ Author's Self Archiving Policies, I confirm this Work has not been accepted for publication elsewhere, is not being considered for publication elsewhere and does not duplicate material already published. I confirm all authors consent to publication of this Work and authorise the granting of this licence.

1  
2  
3 **Sex and age differences in clinically significant symptoms of depression and anxiety among people**  
4  
5 **in Australia in the first month of COVID-19 restrictions: A national survey**  
6  
7  
8  
9

10  
11 Karin Hammarberg\*, Thach Tran, Maggie Kirkman, Jane Fisher  
12

13  
14 Global and Women's Health, Public Health and Preventive Medicine, Monash University, Melbourne,  
15  
16 Australia  
17

18  
19 \* **Corresponding author:** Karin Hammarberg, Karin.hammarberg@monash.edu  
20  
21

22  
23  
24  
25 **Competing interests**  
26

27  
28 The authors have no completing interests to declare.  
29  
30

31  
32  
33 **Funding**  
34

35  
36 This work was supported by an untied philanthropic donation from Professor John McBain and Dr  
37  
38 Penny Foster. This funding source had no role in the study design, execution, data analysis or  
39  
40 interpretation of the data.  
41  
42  
43  
44  
45  
46  
47  
48  
49  
50  
51  
52  
53  
54  
55  
56  
57  
58  
59  
60

## Abstract

**Objectives:** To identify sex and age differences in clinically significant symptoms of depression and anxiety and the factors associated with these differences among adults in Australia during the first month of COVID-19 related restrictions.

**Design:** An anonymous online survey.

**Setting:** Australia.

**Participants:** Adults aged over 18 years living in Australia were eligible and 13,829 contributed complete data. Of these, 13,762 identified as either female (10,434) or male (3,328) and were included in analyses.

**Interventions:** None

**Outcome measures:** Clinically significant symptoms of depression or anxiety as indicated by a score of  $\geq 10$  on the Patient Health Questionnaire 9 (PHQ-9) (depression) or the Generalised Anxiety Disorder Scale 7 (GAD-7), and experiences of irritability (GAD-7 Item 6).

**Results:** Women were more likely than men to have clinically significant symptoms of depression (26.3% versus 20.1%,  $p < 0.001$ ) and anxiety (21.8% versus 14.2%,  $p < 0.001$ ) and to have experienced irritability at least several days in the previous fortnight (63.1% versus 51.4%,  $p < 0.001$ ). They were also more likely than men to be doing unpaid work caring for children (22.8% versus 8.6%,  $p < 0.001$ ) and dependent relatives (9.8% versus 5.7%,  $p < 0.001$ ) which made significant contributions to the mental health outcomes of interest. Loss of employment, fear of contracting COVID-19, and feeling a severe impact of the restrictions were associated with poorer mental health in both women and men of all ages.

**Conclusions:** Rates of clinically significant symptoms of depression and anxiety were high overall and higher among women than men. Rather than being intrinsically more vulnerable to mental health problems during the COVID-19 pandemic, the higher risk of clinically significant symptoms of anxiety

1  
2  
3 and depression among women may in part be explained by their disproportionate burden of unpaid  
4  
5 caregiving.  
6  
7  
8  
9  
10

### 11 **Strengths and limitations of this study**

12  
13

- 14 • This national survey was launched four days after significant restrictions to limit the spread  
15 of COVID-19 were mandated in Australia.
- 16 • More than 13,800 people from all states and territories completed the survey.
- 17 • Almost 75% of respondents were women.
- 18 • We ascertained sex and age differences in factors contributing to poorer mental health.
- 19 • As this was a cross-sectional study, causal relationships cannot be established with certainty.
- 20  
21  
22  
23  
24  
25  
26  
27  
28  
29  
30  
31  
32  
33  
34  
35  
36  
37  
38  
39  
40  
41  
42  
43  
44  
45  
46  
47  
48  
49  
50  
51  
52  
53  
54  
55  
56  
57  
58  
59  
60

## Introduction

As the World Health Organization declared the Severe Acute Respiratory Syndrome Coronavirus 2 (SARS-CoV-2, resulting in COVID-19) outbreak a pandemic, many countries adopted restrictions on people's movements and activities to limit its spread. In Australia, the first confirmed case of COVID-19 was identified in late January 2020.[1, 2] The spread of the virus was initially slow but upward trends in infection rates and the seriousness of this threat to public health led to the establishment of the National Cabinet, an intergovernmental decision-making forum, to coordinate the national response to the COVID-19 pandemic in Australia.[3] In late March, national lockdown measures were mandated to limit the spread of the virus. They included requirements to stay at home except for a few specified reasons, work from home wherever possible, limit physical proximity, meet online and not in person, avoid visits to residential aged care facilities, limit attendance at weddings to five and at funerals to ten people, cancel interstate and international travel, and close schools and other educational institutions and move to learning from home.

As a result of the restrictions, economic activity stalled and unemployment soared. Concerns about the mental health consequences of being confined to home, loss of employment, financial strain, loss of freedom to move, and uncertainty about the future have been expressed by health professionals and widely reported in the media.[4-6] The media and health professionals have focused on the likelihood of the pandemic and its associated restrictions increasing the risk of severe mental illness and rates of suicide. However, the possible implications of the COVID-19 restrictions for psychological wellbeing at a population level have received less attention.

Studies in Australia, the United States, and the United Kingdom have reported that COVID-19-related restrictions have adversely affected women's mental health more than men's but the potential underlying reasons for this have not been described.[7-10]

1  
2  
3 Experts call for high-quality population-level data on the mental health effects of the COVID-19  
4 pandemic to inform government responses, to mitigate adverse effects, and to prepare for future  
5 national crises.[11] This should include identifying factors that increase the risk of poor mental  
6 health in subgroups of the population.  
7  
8  
9  
10

11  
12 The aim of this component of a larger project was to identify sex and age differences in clinically  
13 significant symptoms of depression and anxiety and the factors associated with these among adults  
14 in Australia during the first month of COVID-19-related restrictions.  
15  
16  
17  
18  
19  
20  
21  
22

### 23 **Method**

24  
25 The research was approved by Monash University Human Research Ethics Committee (2020-24080-  
26 42716).  
27  
28  
29  
30

### 31 ***Patient and Public Involvement***

32  
33 No patient involved.  
34  
35  
36

### 37 ***Design***

38  
39 A short, anonymous online survey of people living in Australia aged at least 18 years was launched  
40 four days after the COVID-19 restrictions were implemented. It included demographic questions;  
41 study-specific, fixed-response-option questions about experiences of COVID-19 and the associated  
42 restrictions; and two widely used standardised psychometric instruments measuring symptoms of  
43 depression and anxiety.  
44  
45  
46  
47  
48  
49

50  
51 A sample size of 3,074 people is required to estimate the prevalence of people (20%) with a mental  
52 health problem (at the precision of 2% taking into account design effect = 2).  
53  
54  
55

56 Detailed information about the design, data source, and procedure have been published.[12]  
57  
58  
59

### 60 ***Socio-demographic questions***



1  
2  
3 Study-specific questions were used to ascertain age, area of residence, gender, and living and work  
4  
5 circumstances.

6  
7  
8 Socioeconomic Indices for Areas (SEIFA) were derived from each respondent's postcode using the  
9  
10 most recent Australian Bureau of Statistics data.[13] SEIFA provides measures of socio-economic  
11  
12 conditions by geographic area.

### 13 14 15 ***Experience of COVID 19 and the associated restrictions***

16  
17  
18 Study-specific questions assessed:

- 19  
20  
21 i. Direct experience of COVID-19: whether the respondent had been diagnosed with or tested  
22  
23 for COVID-19, or lived with or knew someone with COVID-19: yes / no.  
24  
25  
26 ii. Whether a job had been lost because of COVID-19 restrictions: yes / no.  
27  
28  
29 iii. Worry about contracting COVID-19: a visual analogue scale with scores from 0 (not at all  
30  
31 worried) to 10 (extremely worried).  
32  
33  
34 iv. How badly COVID-19 restrictions had affected daily life: a visual analogue scale with scores  
35  
36 from 0 (not at all badly) to 10 (very badly).  
37  
38  
39

### 40 41 42 ***Psychological wellbeing***

43  
44 Two standardised psychometric instruments were used to assess symptoms of depression and  
45  
46 generalised anxiety experienced over the previous two weeks.

#### 47 48 ***Patient Health Questionnaire 9 (PHQ-9)***

49  
50  
51 The PHQ-9[14] is a 9-item scale asking respondents to state how often they have experienced each  
52  
53 depressive symptom in the last fortnight on a four-point scale: 0=Not at all, 1=Several days, 2=More  
54  
55 than half the days, and 3=Nearly every day. Aggregated responses yield a scale indicative of symptom  
56  
57 severity. Formally validated against diagnostic psychiatric interviews, a PHQ-9 score  $\geq 10$  has sensitivity  
58  
59  
60

of 88% and specificity of 88% for Major Depression. PHQ-9 scores of 5-9 represent mild, 10-14 moderate, 15-19 moderately severe, and  $\geq 20$  severe depressive symptoms.

### *Generalised Anxiety Disorder Scale (GAD-7)*

The GAD-7[15] is a 7-item scale assessing common symptoms of anxiety that uses the same response options as PHQ-9. In formal validation against psychiatric interviews, a GAD-7 score  $\geq 10$  has sensitivity of 89% and specificity of 82% to detect Generalised Anxiety Disorder. Scores of 5-9 represent mild, 10-14 moderate, and 15-21 severe anxiety. Higher scores are strongly associated with functional impairment. GAD-7 Item 6 asks whether the respondent is 'Becoming irritable or easily annoyed'.

### ***Procedure***

The survey was built in Qualtrics Insight Platform (Qualtrics, Provo, UT). It was available from April 3 to May 2, 2020. A link to the survey was hosted on the Monash University website and information about it was distributed widely on news and social media and through organisational and personal networks.

### ***Data management and statistical analysis***

The outcomes were whether, in the last fortnight, the respondent had experienced:

1. Clinically significant symptoms of depression: PHQ-9 scores  $\geq 10$ .
2. Clinically significant symptoms of anxiety: GAD-7 scores  $\geq 10$ .
3. Becoming easily annoyed or irritable: GAD 7 item 7 score  $> 0$

The visual analogue scales were categorised into two groups: not at all or none to moderate (0-7) and high ( $\geq 8$ ).

Data were analysed in two stages.

- 1  
2  
3 1. Social-demographic characteristics, experience of COVID 19 and the associated restrictions, and  
4  
5 psychological wellbeing were described separately by women and men. Tests of statistical  
6  
7 significance (chi-square) were conducted to compare characteristics by gender.  
8  
9
- 10  
11  
12 2. Sex and age differences in the factors associated with clinically significant symptoms of depression  
13  
14 and anxiety and becoming easily annoyed or irritable were examined using multiple logistic  
15  
16 regression analyses for each of the four sub-groups (women 18-49 years, women 50 years and  
17  
18 older, men 18-49 years, and men 50 years and older). Multiple logistic regression analyses were  
19  
20 performed for each of the outcomes and included as potential explanatory factors social-  
21  
22 demographic characteristics and experiences of COVID-19.  
23  
24

25  
26 Only complete data were included in analyses, which were conducted using STATA Version 16  
27  
28 (StataCorp., College Station, TX).  
29  
30

## 31 32 33 34 **Results**

35  
36  
37 Of the 15,121 respondents who began the questionnaire, 13,829 (91.5%) contributed complete data.  
38  
39 Of these, 13,762 identified as either female or male and were included in analyses. We excluded  
40  
41 people from the analyses reported in this paper who did not identify as either female or male  
42  
43 because the size of the group (N= 67) was relatively small and, in our opinion, the needs of this  
44  
45 group warrant distinct consideration.  
46  
47

### 48 49 ***Respondent characteristics***

50  
51  
52 Respondents' characteristics are in Table 1. Three quarters of the respondents were women. All age  
53  
54 groups and socioeconomic positions were represented. About one in five respondents were living on  
55  
56 their own. Women were more likely than men to have clinically significant symptoms of depression  
57  
58 and anxiety and to report irritability. They were also more likely to do unpaid work caring for children  
59  
60

1  
2  
3 and dependent relatives. Almost one in ten had lost their job as a result of COVID-19. About one in  
4  
5 seven were highly worried about contracting COVID-19 and one in four perceived that the restrictions  
6  
7 had a highly adverse effect on their lives.  
8  
9

10 [TABLE 1 ABOUT HERE]  
11  
12

### 13 ***Factors associated with mental health outcomes*** 14

15  
16 The factors associated with clinically significant symptoms of depression and anxiety and experiencing  
17  
18 irritability for women and men in two age groups are shown in Tables 2, 3, and 4, respectively. Being  
19  
20 highly worried about contracting COVID-19 and perceiving that the restrictions affected personal life  
21  
22 very badly were associated with all outcomes for both women and men of all ages.  
23  
24

#### 25 *Sex and age differences in factors influencing risk of clinically significant symptoms of depression* 26 27

28  
29 For women and men in both age groups, living with family rather than living on their own or with non-  
30  
31 family members reduced the risk of clinically significant symptoms of depression, and the loss of a job  
32  
33 as a result of COVID-19 increased the risk. Occupying a higher socioeconomic position was protective  
34  
35 for all groups, but this reached statistical significance only for women. Unpaid work caring for children  
36  
37 increased the risk for women aged >50 years and decreased the risk for younger women. The effect  
38  
39 on men of caring for children was not significant. Caring for dependent relatives increased risk for all  
40  
41 except men aged >50 years.  
42  
43  
44

45 [TABLE 2 ABOUT HERE]  
46  
47

#### 48 *Sex and age differences in factors influencing risk of clinically significant symptoms of anxiety* 49 50

51  
52 Living with family was protective for all except for women aged >50 years, for whom it increased the  
53  
54 risk of clinically significant symptoms of anxiety. Unpaid work caring for children also increased the  
55  
56 risk for women aged >50 years but not for younger women or men. Caring for dependent relatives  
57  
58 increased risk for all but men aged <50 years. The loss of a job increased risk for women aged >50  
59  
60 years.

1  
2  
3 [TABLE 3 ABOUT HERE]  
4  
5

6 *Sex and age differences in factors influencing risk of irritability*  
7

8  
9 Living with family increased the risk of reported irritability in women of all ages but not in men. Caring  
10 for children increased risk of irritability in women of all ages and men aged <50 years but not in older  
11 men. Caring for dependent relatives increased risk of irritability in women and men aged >50 years  
12 but not in younger men. The loss of a job increased risk for all but women aged <50 years.  
13  
14  
15  
16  
17

18 [TABLE 4 ABOUT HERE]  
19  
20  
21  
22  
23

24 **Discussion**  
25

26  
27 This population-based study identified sex and age differences in the mental health consequences of  
28 COVID-19 restrictions and associated factors. While the loss of a job, being very fearful of contracting  
29 COVID-19, and experiencing the restrictions as highly adverse for daily life increased the risk of  
30 clinically significant symptoms of anxiety and depression and of reported irritability in almost all  
31 groups, other factors were more likely to affect the mental health of sub-groups.  
32  
33  
34  
35  
36  
37  
38

39 Strengths of this study include the large sample. Validated measures of symptoms of anxiety and  
40 depression were used and the survey included questions about respondents' experiences of COVID-  
41 19, level of concern about contracting COVID-19, loss of a job due to COVID-19, and how badly COVID-  
42 19 restrictions had affected daily life. However, limitations are also acknowledged including the much  
43 higher proportion of women than men completing the survey. As a result, while we are confident that  
44 the findings accurately reflect the impact of the restrictions on women's mental health, it is possible  
45 that we can be less confident about our understanding of their impact on the mental health of men.  
46  
47  
48  
49  
50  
51  
52  
53  
54  
55  
56  
57  
58  
59  
60

1  
2  
3 underestimates of the mental health impacts of the restrictions on the population. Lastly, the cross-  
4  
5 sectional design does not allow causal relationships to be established.  
6  
7

8 The mental health effects of living with family members rather than alone or with non-family members  
9  
10 varied by group. While living with family members was protective against symptoms of depression for  
11  
12 all groups, it increased the risk of anxiety in women >50. Furthermore, it increased the risk of reported  
13  
14 irritability for women of all ages but not for men. A possible explanation for these findings is that, as  
15  
16 a consequence of COVID-19 and its associated restrictions on the economy and labour market, many  
17  
18 young people lost employment and became unable to pay rent and other living expenses and  
19  
20 therefore had to move back to their family home. A recent survey revealed that 26% of households in  
21  
22 Australia have an adult child living at home. Of those households, 21% have an adult child who has  
23  
24 returned home because of COVID-19.[16] The work of re-establishing expectations of how to live  
25  
26 together, negotiating contributions to household tasks, and dealing with adult children's feelings of  
27  
28 frustration may have been largely carried by women which may have contributed to their higher risk  
29  
30 of anxiety and irritability.  
31  
32  
33  
34  
35

36 The unpaid work of caring for children and dependent relatives is disproportionately carried by  
37  
38 women. In 2015 women in Australia did 11.5 hours per week more unpaid labour than men.[17] This  
39  
40 study found that caring for dependent relatives contributed significantly to the risk of symptoms of  
41  
42 depression and anxiety and reported irritability in all groups. In response to the pandemic, many  
43  
44 services accessed by people with dependent relatives such as special schools, allied health, and  
45  
46 disability services became restricted or unavailable. This may have increased the burden of caring and  
47  
48 contributed to the poorer mental health of people caring for dependent relatives. Findings were less  
49  
50 consistent on the impact on mental health of caring for children. Whereas this contributed  
51  
52 significantly to symptoms of depression and anxiety in women aged >50, in younger women it reduced  
53  
54 the risk of symptoms of depression and it had no effect on the mental health of men. Younger women  
55  
56 are likely to have younger children than older women and they may be easier to manage at home than  
57  
58  
59  
60

1  
2  
3 adolescents and young adults. Furthermore, the restriction related changes in the caring  
4 responsibilities of women with young dependent children may have been less dramatic than for those  
5  
6 with adolescents or young adult children. The strain of being largely confined to home and managing  
7  
8 the needs and frustrations of adolescents or young adults who have to learn from home rather than  
9  
10 together with peers at school or university might explain the increased risk of symptoms of depression  
11  
12 and anxiety in women aged >50.  
13  
14  
15

16  
17 The findings of this study make a significant contribution to knowledge about the sex- and age-specific  
18 factors that contribute to poor mental health during government-imposed restrictions in response to  
19  
20 the COVID-19 pandemic. They suggest that some factors increase the risk of poor mental health in  
21  
22 women and men of all ages. Others, however, are more likely to affect the mental health of women  
23  
24 and indicate that, rather than being intrinsically more vulnerable to mental health problems during  
25  
26 the COVID-19 pandemic, their higher risk of poor mental health may in part be explained by their  
27  
28 disproportionately large share of the burden of unpaid caring work which increased with the closure  
29  
30 of usual services like schools and disability services. These findings can inform public health strategies  
31  
32 to help at risk groups recover once the restrictions are lifted. As recommended in a recent policy brief  
33  
34 issued by the United Nations, these should include rapid implementation of 'a whole-of-society  
35  
36 approach to promote, protect, and care for mental health; ensuring widespread availability of mental  
37  
38 health and psychosocial support; and supporting recovery from COVID-19 by building mental health  
39  
40 services for the future'. [18]  
41  
42  
43  
44  
45  
46  
47  
48  
49

#### 50 **Authors' contributions**

51  
52 The survey was developed and implemented by the members of the Monash COVID -19 Restrictions  
53  
54 Research Group: Jane Fisher, Thach Tran, Karin Hammarberg, Jayagowri Sastry, Hau Nguyen,  
55  
56 Heather Rowe, Sally Popplestone, Ruby Stocker, Claire Stubber, and Maggie Kirkman.  
57  
58  
59  
60

1  
2  
3 KH, TT, MK and JF contributed to the conceptualisation of the research question and interpretation  
4  
5 of the data. TT analysed the data. KH lead the manuscript writing. TT, MK and JF provided  
6  
7 constructive feedback and approved of the final version.  
8  
9  
10  
11  
12  
13  
14  
15  
16  
17  
18  
19  
20  
21  
22  
23  
24  
25  
26  
27  
28  
29  
30  
31  
32  
33  
34  
35  
36  
37  
38  
39  
40  
41  
42  
43  
44  
45  
46  
47  
48  
49  
50  
51  
52  
53  
54  
55  
56  
57  
58  
59  
60

For peer review only



Table 1 Respondent characteristics (n=13,762)

|                                                                                        | <b>Total<br/>n (%)</b> | <b>Females<br/>n (%)</b> | <b>Males<br/>n (%)</b> | <b>p-value</b> |
|----------------------------------------------------------------------------------------|------------------------|--------------------------|------------------------|----------------|
| <b>Total</b>                                                                           | <b>13762</b>           | <b>10434 (75.8)</b>      | <b>3328 (24.2)</b>     |                |
| <b>Age group</b>                                                                       |                        |                          |                        | < 0.001        |
| 18-29                                                                                  | 1323 (9.6)             | 1033 (9.9)               | 290 (8.7)              |                |
| 30-39                                                                                  | 2275 (16.5)            | 1860 (17.8)              | 415 (12.5)             |                |
| 40-49                                                                                  | 2842 (20.7)            | 2334 (22.4)              | 508 (15.3)             |                |
| 50-59                                                                                  | 3055 (22.2)            | 2309 (22.1)              | 746 (22.4)             |                |
| 60-69                                                                                  | 2825 (20.5)            | 2016 (19.3)              | 809 (24.3)             |                |
| 70 +                                                                                   | 1442 (10.5)            | 882 (8.5)                | 560 (16.8)             |                |
| <b>SEIFA quintiles</b>                                                                 |                        |                          |                        | < 0.001        |
| Quintile 1 (Lowest socio-economic position)                                            | 1086 (7.9)             | 760 (7.3)                | 326 (9.8)              |                |
| Quintile 2                                                                             | 1534 (11.2)            | 1127 (10.8)              | 407 (12.2)             |                |
| Quintile 3                                                                             | 2222 (16.2)            | 1670 (16.0)              | 552 (16.6)             |                |
| Quintile 4                                                                             | 3024 (22.0)            | 2313 (22.2)              | 711 (21.4)             |                |
| Quintile 5 (Highest socio-economic position)                                           | 5896 (42.8)            | 4564 (43.7)              | 1332 (40)              |                |
| <b>Living situation</b>                                                                |                        |                          |                        | < 0.001        |
| On your own                                                                            | 2646 (19.2)            | 2033 (19.5)              | 613 (18.4)             |                |
| With only your partner / your partner and children / adult family members              | 9594 (69.7)            | 7190 (68.9)              | 2404 (72.2)            |                |
| With children and without a partner                                                    | 576 (4.2)              | 527 (5.1)                | 49 (1.5)               |                |
| In a shared house with non-family members / Other                                      | 946 (6.9)              | 684 (6.6)                | 262 (7.9)              |                |
| <b>Doing unpaid work caring for children</b>                                           | 2664 (19.4)            | 2377 (22.8)              | 287 (8.6)              | < 0.001        |
| <b>Doing unpaid work caring for dependent relatives</b>                                | 1205 (8.8)             | 1017 (9.8)               | 188 (5.7)              | < 0.001        |
| <b>Lost job because of COVID-19</b>                                                    | 1241 (9.0)             | 964 (9.2)                | 277 (8.3)              | 0.108          |
| <b>Highly worried about contracting COVID-19 (scale score <math>\geq</math> 8)</b>     | 2167 (15.8)            | 1730 (16.6)              | 437 (13.1)             | < 0.001        |
| <b>High adverse impact of restrictions (scale score <math>\geq</math> 8)</b>           | 3414 (24.8)            | 2661 (25.5)              | 753 (22.6)             | 0.001          |
| <b>Clinically significant symptoms of depression, PHQ-9 score <math>\geq</math> 10</b> | 3408 (24.8)            | 2740 (26.3)              | 668 (20.1)             | < 0.001        |
| <b>Clinically significant symptoms of anxiety, GAD-7 score <math>\geq</math> 10</b>    | 2747 (20.0)            | 2275 (21.8)              | 472 (14.2)             | < 0.001        |
| <b>Becoming easily annoyed or irritable GAD 7 Item 6 &gt; 0</b>                        | 8291 (60.2)            | 6579 (63.1)              | 1712 (51.4)            | < 0.001        |

Table 2 Factors associated with clinically significant symptoms of depression (PHQ-9 scores  $\geq 10$ )

|                                                                             | Females                  |                          | Males                    |                          |
|-----------------------------------------------------------------------------|--------------------------|--------------------------|--------------------------|--------------------------|
|                                                                             | 18-49 years old          | 50 years old and above   | 18-49 years old          | 50 years old and above   |
| <b>Living with family vs. not living with family</b>                        | <b>0.63 [0.54; 0.74]</b> | <b>0.71 [0.6; 0.83]</b>  | <b>0.6 [0.45; 0.8]</b>   | <b>0.4 [0.3; 0.53]</b>   |
| <b>SEIFA quintiles</b>                                                      |                          |                          |                          |                          |
| Quintile 1 (Lowest SEP)                                                     |                          |                          |                          |                          |
| Quintile 2                                                                  | 0.8 [0.58; 1.08]         | 0.85 [0.63; 1.16]        | 0.75 [0.39; 1.45]        | 0.82 [0.5; 1.34]         |
| Quintile 3                                                                  | <b>0.66 [0.49; 0.87]</b> | 0.88 [0.66; 1.17]        | 0.96 [0.54; 1.7]         | 0.95 [0.59; 1.52]        |
| Quintile 4                                                                  | 0.78 [0.6; 1.01]         | 0.78 [0.58; 1.03]        | 0.95 [0.55; 1.64]        | 0.85 [0.54; 1.33]        |
| Quintile 5 (Highest SEP)                                                    | <b>0.62 [0.48; 0.8]</b>  | <b>0.71 [0.55; 0.93]</b> | 0.87 [0.52; 1.45]        | 0.7 [0.46; 1.07]         |
| <b>Doing unpaid work caring for children</b>                                | <b>0.83 [0.72; 0.95]</b> | <b>1.33 [1.05; 1.67]</b> | 1.21 [0.82; 1.78]        | 1.15 [0.66; 2.03]        |
| <b>Doing unpaid work caring for dependent relatives</b>                     | <b>1.52 [1.21; 1.91]</b> | <b>1.55 [1.26; 1.91]</b> | <b>1.8 [1.02; 3.19]</b>  | 1.47 [0.89; 2.44]        |
| <b>Lost job because of COVID-19</b>                                         | <b>1.51 [1.25; 1.82]</b> | <b>1.81 [1.43; 2.28]</b> | <b>1.65 [1.13; 2.41]</b> | <b>1.69 [1.09; 2.62]</b> |
| <b>Highly worried about contracting COVID-19</b><br>(scale score $\geq 8$ ) | <b>1.77 [1.5; 2.09]</b>  | <b>1.62 [1.37; 1.92]</b> | <b>2.02 [1.34; 3.04]</b> | <b>1.57 [1.14; 2.17]</b> |
| <b>High adverse impact of restrictions</b> (scale score $\geq 8$ )          | <b>3.34 [2.93; 3.81]</b> | <b>2.81 [2.41; 3.28]</b> | <b>2.91 [2.2; 3.84]</b>  | <b>4.36 [3.32; 5.72]</b> |

Table 3 Factors associated with clinically significant symptoms of anxiety (GAD-7 score  $\geq 10$ )

|                                                                                    | Females                  |                          | Males                    |                          |
|------------------------------------------------------------------------------------|--------------------------|--------------------------|--------------------------|--------------------------|
|                                                                                    | 18-49 years old          | 50 years old and above   | 18-49 years old          | 50 years old and above   |
| <b>Living with family vs. not living with family</b>                               | <b>0.83 [0.7; 0.99]</b>  | <b>1.27 [1.05; 1.53]</b> | <b>0.61 [0.44; 0.85]</b> | <b>0.6 [0.43; 0.83]</b>  |
| <b>SEIFA quintiles</b>                                                             |                          |                          |                          |                          |
| Quintile 1 (Lowest SEP)                                                            |                          |                          |                          |                          |
| Quintile 2                                                                         | 0.82 [0.6; 1.14]         | 1.18 [0.82; 1.69]        | 0.81 [0.39; 1.71]        | 0.9 [0.49; 1.67]         |
| Quintile 3                                                                         | <b>0.73 [0.54; 0.97]</b> | 1.13 [0.81; 1.59]        | 1.16 [0.61; 2.19]        | 1.34 [0.76; 2.35]        |
| Quintile 4                                                                         | 0.8 [0.61; 1.05]         | 1.1 [0.79; 1.54]         | 0.99 [0.54; 1.82]        | 1.33 [0.78; 2.27]        |
| Quintile 5 (Highest SEP)                                                           | <b>0.72 [0.56; 0.94]</b> | 1.01 [0.74; 1.38]        | 0.82 [0.46; 1.46]        | 0.92 [0.55; 1.54]        |
|                                                                                    |                          |                          |                          |                          |
| <b>Doing unpaid work caring for children</b>                                       | 0.99 [0.86; 1.14]        | <b>1.34 [1.05; 1.73]</b> | 1.13 [0.73; 1.75]        | 1.07 [0.57; 2.01]        |
| <b>Doing unpaid work caring for dependent relatives</b>                            | <b>1.34 [1.06; 1.69]</b> | <b>1.49 [1.19; 1.87]</b> | 1.5 [0.8; 2.8]           | <b>2.32 [1.38; 3.9]</b>  |
| <b>Lost job because of COVID-19</b>                                                | 1.18 [0.97; 1.44]        | <b>1.56 [1.2; 2.02]</b>  | 1.48 [0.98; 2.24]        | 1.38 [0.83; 2.29]        |
| <b>Highly worried about contracting COVID-19 (scale score <math>\geq 8</math>)</b> | <b>2.49 [2.12; 2.93]</b> | <b>2.44 [2.04; 2.91]</b> | <b>2.91 [1.9; 4.43]</b>  | <b>2.05 [1.45; 2.9]</b>  |
| <b>High adverse impact of restrictions (scale score <math>\geq 8</math>)</b>       | <b>3.03 [2.65; 3.47]</b> | <b>3.13 [2.64; 3.7]</b>  | <b>3.17 [2.34; 4.29]</b> | <b>4.52 [3.31; 6.16]</b> |

Table 4 Factors associated with irritability (GAD-7 item 6 score &gt;0)

|                                                                       | Females                  |                          | Males                    |                          |
|-----------------------------------------------------------------------|--------------------------|--------------------------|--------------------------|--------------------------|
|                                                                       | 18-49 years old          | 50 years old and above   | 18-49 years old          | 50 years old and above   |
| <b>Living with family vs. not living with family</b>                  | <b>1.24 [1.05; 1.47]</b> | <b>1.57 [1.39; 1.78]</b> | 1.2 [0.91; 1.59]         | 1.07 [0.86; 1.32]        |
| <b>SEIFA quintiles</b>                                                |                          |                          |                          |                          |
| Quintile 1 (Lowest SEP)                                               |                          |                          |                          |                          |
| Quintile 2                                                            | 0.99 [0.7; 1.41]         | 1 [0.78; 1.28]           | 0.59 [0.32; 1.11]        | 0.91 [0.64; 1.29]        |
| Quintile 3                                                            | 0.83 [0.61; 1.14]        | 0.95 [0.75; 1.2]         | 0.76 [0.43; 1.33]        | 1.06 [0.76; 1.5]         |
| Quintile 4                                                            | 0.95 [0.71; 1.28]        | 1.08 [0.86; 1.36]        | 0.81 [0.47; 1.39]        | 1.05 [0.76; 1.46]        |
| Quintile 5 (Highest SEP)                                              | 0.97 [0.73; 1.29]        | 0.99 [0.81; 1.23]        | 0.84 [0.51; 1.4]         | 1.09 [0.81; 1.48]        |
|                                                                       |                          |                          |                          |                          |
| <b>Doing unpaid work caring for children</b>                          | <b>1.84 [1.58; 2.14]</b> | <b>1.37 [1.13; 1.67]</b> | <b>1.81 [1.21; 2.7]</b>  | 1.05 [0.71; 1.55]        |
| <b>Doing unpaid work caring for dependent relatives</b>               | <b>1.42 [1.07; 1.89]</b> | <b>1.44 [1.21; 1.72]</b> | 0.99 [0.54; 1.82]        | <b>1.69 [1.16; 2.47]</b> |
| <b>Lost job because of COVID-19</b>                                   | 1.18 [0.94; 1.47]        | <b>1.28 [1.04; 1.59]</b> | <b>1.63 [1.07; 2.49]</b> | <b>1.52 [1.05; 2.19]</b> |
| <b>Highly worried about contracting COVID-19</b><br>(scale score ≥ 8) | <b>1.44 [1.18; 1.77]</b> | <b>1.43 [1.23; 1.65]</b> | <b>2.39 [1.45; 3.94]</b> | <b>1.49 [1.16; 1.91]</b> |
| <b>High adverse impact of restrictions</b> (scale score ≥ 8)          | <b>2.33 [1.96; 2.77]</b> | <b>1.84 [1.6; 2.1]</b>   | <b>2.35 [1.72; 3.22]</b> | <b>2.74 [2.19; 3.43]</b> |

## References

1. *Infertility Treatment Act 1995*. Victorian Government.
2. Australian Government. *First confirmed case of novel coronavirus in Australia*, <https://www.health.gov.au/ministers/the-hon-greg-hunt-mp/media/first-confirmed-case-of-novel-coronavirus-in-australia>. 2020.
3. Menzies, J. *Explainer: what is the national cabinet and is it democratic?*, <https://theconversation.com/explainer-what-is-the-national-cabinet-and-is-it-democratic-135036>. 2020.
4. Mannix, L., <https://www.smh.com.au/national/what-impact-could-the-lockdown-have-on-our-mental-health-20200409-p54inz.html>, in *Sydney Morning Herald*. April 9, 2020.
5. Noyes, J., <https://www.smh.com.au/national/australia-urged-to-plan-for-coronavirus-mental-illness-wave-20200428-p54nwo.html>, in *Sydney Morning Herald*. April 29, 2020.
6. Bartone, T., I. Hickie, and P. McGorry, <https://ama.com.au/media/joint-statement-covid-19-impact-likely-lead-increased-rates-suicide-and-mental-illness> May 9, 2020, Australian Medical Association.
7. Adams-Prassl, A., et al., *The Impact of the Coronavirus Lockdown on Mental Health: Evidence from the US*, in *Working Papers 2020-030*. 2020, Human Capital and Economic Opportunity Working Group.
8. Hamel, L., et al., *KFF Coronavirus Poll: March 2020*. 2020: <https://www.kff.org/coronavirus-covid-19/poll-finding/kff-coronavirus-poll-march-2020/>.
9. Ipsos MORI, <https://www.ipsos.com/ipsos-mori/en-uk/6-10-women-finding-it-harder-stay-positive-day-day-due-coronavirus>. 2020.
10. Australian Bureau of Statistics. *4940.0 - Household Impacts of COVID-19 Survey, 14-17 Apr 2020*, <https://www.abs.gov.au/AUSSTATS/abs@.nsf/allprimarymainfeatures/86FF043DD0C1A1B8CA25856B0081D6F7?opendocument>. 2020.

- 1  
2  
3 11. Holmes, E.A., et al., *Multidisciplinary research priorities for the COVID-19 pandemic: a call for*  
4 *action for mental health science*. *Lancet Psychiatry*, 2020. **7**(6): p. 547-560.
- 5  
6  
7 12. Fisher, J., et al., *Mental health of people in Australia in the first month of COVID-19*  
8 *restrictions: a national survey*. *Med J Aust*, 2020.  
9  
10 [https://www.mja.com.au/journal/2020/mental-health-people-australia-first-month-](https://www.mja.com.au/journal/2020/mental-health-people-australia-first-month-covid-19-restrictions-national-survey)  
11 [covid-19-restrictions-national-survey](https://www.mja.com.au/journal/2020/mental-health-people-australia-first-month-covid-19-restrictions-national-survey).
- 12  
13  
14  
15  
16 13. Australian Bureau of Statistics.  
17  
18 <http://www.abs.gov.au/websitedbs/censushome.nsf/home/seifa>. 2020.
- 19  
20  
21 14. Kroenke, K., R.L. Spitzer, and J.B. Williams, *The PHQ-9: validity of a brief depression severity*  
22 *measure*. *J Gen Intern Med*, 2001. **16**(9): p. 606-13.
- 23  
24  
25 15. Spitzer, R.L., et al., *A Brief Measure for Assessing Generalized Anxiety Disorder: The GAD-7*.  
26 *Archives of Internal Medicine*, 2006. **166**(10): p. 1092-1097.
- 27  
28  
29  
30 16. Browne, K. [https://www.finder.com.au/press-release-may-2020-boomeranging-generation-](https://www.finder.com.au/press-release-may-2020-boomeranging-generation-moves-home-due-to-covid-19)  
31 [moves-home-due-to-covid-19](https://www.finder.com.au/press-release-may-2020-boomeranging-generation-moves-home-due-to-covid-19). 2020.
- 32  
33  
34  
35 17. Australian Government Department of Education Skills and Employment.  
36  
37 [https://www.employment.gov.au/newsroom/how-we-share-unpaid-labour-home-informs-](https://www.employment.gov.au/newsroom/how-we-share-unpaid-labour-home-informs-employment-policy)  
38 [employment-policy](https://www.employment.gov.au/newsroom/how-we-share-unpaid-labour-home-informs-employment-policy). 2019.
- 39  
40  
41 18. United Nations, *Policy Brief: COVID-19 and the Need for Action on Mental Health*,  
42 [https://www.un.org/sites/un2.un.org/files/un\\_policy\\_brief-](https://www.un.org/sites/un2.un.org/files/un_policy_brief-covid_and_mental_health_final.pdf)  
43 [covid\\_and\\_mental\\_health\\_final.pdf](https://www.un.org/sites/un2.un.org/files/un_policy_brief-covid_and_mental_health_final.pdf). 2020.
- 44  
45  
46  
47  
48  
49  
50  
51  
52  
53  
54  
55  
56  
57  
58  
59  
60

1  
2  
3  
4  
5  
6  
7  
8  
9  
10  
11  
12  
13  
14  
15  
16  
17  
18  
19  
20  
21  
22  
23  
24  
25  
26  
27  
28  
29  
30  
31  
32  
33  
34  
35  
36  
37  
38  
39  
40  
41  
42  
43  
44  
45  
46  
47  
48  
49  
50  
51  
52  
53  
54  
55  
56  
57  
58  
59  
60STROBE Statement—Checklist of items that should be included in reports of *cross-sectional studies*

|                              | Item No | Recommendation                                                                                                                                                                                               | Page            |
|------------------------------|---------|--------------------------------------------------------------------------------------------------------------------------------------------------------------------------------------------------------------|-----------------|
| <b>Title and abstract</b>    | 1       | (a) Indicate the study's design with a commonly used term in the title or the abstract                                                                                                                       | p 1             |
|                              |         | (b) Provide in the abstract an informative and balanced summary of what was done and what was found                                                                                                          | p 2             |
| <b>Introduction</b>          |         |                                                                                                                                                                                                              |                 |
| Background/rationale         | 2       | Explain the scientific background and rationale for the investigation being reported                                                                                                                         | p 4-5           |
| Objectives                   | 3       | State specific objectives, including any prespecified hypotheses                                                                                                                                             | p 5             |
| <b>Methods</b>               |         |                                                                                                                                                                                                              |                 |
| Study design                 | 4       | Present key elements of study design early in the paper                                                                                                                                                      | p 5             |
| Setting                      | 5       | Describe the setting, locations, and relevant dates, including periods of recruitment, exposure, follow-up, and data collection                                                                              | p 5-7           |
| Participants                 | 6       | (a) Give the eligibility criteria, and the sources and methods of selection of participants                                                                                                                  | p 5             |
| Variables                    | 7       | Clearly define all outcomes, exposures, predictors, potential confounders, and effect modifiers. Give diagnostic criteria, if applicable                                                                     | p 5-7           |
| Data sources/<br>measurement | 8*      | For each variable of interest, give sources of data and details of methods of assessment (measurement). Describe comparability of assessment methods if there is more than one group                         | p 5-7           |
| Bias                         | 9       | Describe any efforts to address potential sources of bias                                                                                                                                                    | p 5             |
| Study size                   | 10      | Explain how the study size was arrived at                                                                                                                                                                    | p 5             |
| Quantitative variables       | 11      | Explain how quantitative variables were handled in the analyses. If applicable, describe which groupings were chosen and why                                                                                 | p 7-8           |
| Statistical methods          | 12      | (a) Describe all statistical methods, including those used to control for confounding                                                                                                                        | 7-8             |
|                              |         | (b) Describe any methods used to examine subgroups and interactions                                                                                                                                          | p 7-8           |
|                              |         | (c) Explain how missing data were addressed                                                                                                                                                                  | p 8             |
|                              |         | (d) If applicable, describe analytical methods taking account of sampling strategy                                                                                                                           | N/A             |
|                              |         | (e) Describe any sensitivity analyses                                                                                                                                                                        | N/A             |
| <b>Results</b>               |         |                                                                                                                                                                                                              |                 |
| Participants                 | 13*     | (a) Report numbers of individuals at each stage of study—eg numbers potentially eligible, examined for eligibility, confirmed eligible, included in the study, completing follow-up, and analysed            | p 8             |
|                              |         | (b) Give reasons for non-participation at each stage                                                                                                                                                         | N/A             |
|                              |         | (c) Consider use of a flow diagram                                                                                                                                                                           |                 |
| Descriptive data             | 14*     | (a) Give characteristics of study participants (eg demographic, clinical, social) and information on exposures and potential confounders                                                                     | p 8 and Table 1 |
|                              |         | (b) Indicate number of participants with missing data for each variable of interest <i>Only surveys with complete data were included in analysis</i>                                                         |                 |
| Outcome data                 | 15*     | Report numbers of outcome events or summary measures                                                                                                                                                         | p 9-10          |
| Main results                 | 16      | (a) Give unadjusted estimates and, if applicable, confounder-adjusted estimates and their precision (eg, 95% confidence interval). Make clear which confounders were adjusted for and why they were included | Tables 2-4      |

|                          |    |                                                                                                                                                                            |           |
|--------------------------|----|----------------------------------------------------------------------------------------------------------------------------------------------------------------------------|-----------|
|                          |    | (b) Report category boundaries when continuous variables were categorized                                                                                                  | Table 2-4 |
|                          |    | (c) If relevant, consider translating estimates of relative risk into absolute risk for a meaningful time period                                                           | N/A       |
| Other analyses           | 17 | Report other analyses done—eg analyses of subgroups and interactions, and sensitivity analyses                                                                             | N/A       |
| <b>Discussion</b>        |    |                                                                                                                                                                            |           |
| Key results              | 18 | Summarise key results with reference to study objectives                                                                                                                   | p 10-12   |
| Limitations              | 19 | Discuss limitations of the study, taking into account sources of potential bias or imprecision. Discuss both direction and magnitude of any potential bias                 | p 10      |
| Interpretation           | 20 | Give a cautious overall interpretation of results considering objectives, limitations, multiplicity of analyses, results from similar studies, and other relevant evidence | p 10-12   |
| Generalisability         | 21 | Discuss the generalisability (external validity) of the study results                                                                                                      | p 11-12   |
| <b>Other information</b> |    |                                                                                                                                                                            |           |
| Funding                  | 22 | Give the source of funding and the role of the funders for the present study and, if applicable, for the original study on which the present article is based              | p 1       |

\*Give information separately for exposed and unexposed groups.

**Note:** An Explanation and Elaboration article discusses each checklist item and gives methodological background and published examples of transparent reporting. The STROBE checklist is best used in conjunction with this article (freely available on the Web sites of PLoS Medicine at <http://www.plosmedicine.org/>, Annals of Internal Medicine at <http://www.annals.org/>, and Epidemiology at <http://www.epidem.com/>). Information on the STROBE Initiative is available at [www.strobe-statement.org](http://www.strobe-statement.org).



# BMJ Open

## Sex and age differences in clinically significant symptoms of depression and anxiety among people in Australia in the first month of COVID-19 restrictions: A national survey

|                                 |                                                                                                                                                                                                                                                                                                                                                                                                                                          |
|---------------------------------|------------------------------------------------------------------------------------------------------------------------------------------------------------------------------------------------------------------------------------------------------------------------------------------------------------------------------------------------------------------------------------------------------------------------------------------|
| Journal:                        | <i>BMJ Open</i>                                                                                                                                                                                                                                                                                                                                                                                                                          |
| Manuscript ID                   | bmjopen-2020-042696.R1                                                                                                                                                                                                                                                                                                                                                                                                                   |
| Article Type:                   | Original research                                                                                                                                                                                                                                                                                                                                                                                                                        |
| Date Submitted by the Author:   | 13-Oct-2020                                                                                                                                                                                                                                                                                                                                                                                                                              |
| Complete List of Authors:       | Hammarberg, Karin; Monash University, School of Public Health and Preventative Medicine<br>Tran, Thach; Monash University, Global and Women's Health, School of Public Health and Preventive Medicine<br>Kirkman, Maggie; Monash University, Jean Hailes Research Unit, School of Public Health and Preventive Medicine<br>Fisher, Jane; Monash University, Jean Hailes Research Unit, School of Public Health and Preventative Medicine |
| <b>Primary Subject Heading</b>: | Mental health                                                                                                                                                                                                                                                                                                                                                                                                                            |
| Secondary Subject Heading:      | Mental health, Public health                                                                                                                                                                                                                                                                                                                                                                                                             |
| Keywords:                       | MENTAL HEALTH, PUBLIC HEALTH, SOCIAL MEDICINE                                                                                                                                                                                                                                                                                                                                                                                            |
|                                 |                                                                                                                                                                                                                                                                                                                                                                                                                                          |

SCHOLARONE™  
Manuscripts



I, the Submitting Author has the right to grant and does grant on behalf of all authors of the Work (as defined in the below author licence), an exclusive licence and/or a non-exclusive licence for contributions from authors who are: i) UK Crown employees; ii) where BMJ has agreed a CC-BY licence shall apply, and/or iii) in accordance with the terms applicable for US Federal Government officers or employees acting as part of their official duties; on a worldwide, perpetual, irrevocable, royalty-free basis to BMJ Publishing Group Ltd ("BMJ") its licensees and where the relevant Journal is co-owned by BMJ to the co-owners of the Journal, to publish the Work in this journal and any other BMJ products and to exploit all rights, as set out in our [licence](#).

The Submitting Author accepts and understands that any supply made under these terms is made by BMJ to the Submitting Author unless you are acting as an employee on behalf of your employer or a postgraduate student of an affiliated institution which is paying any applicable article publishing charge ("APC") for Open Access articles. Where the Submitting Author wishes to make the Work available on an Open Access basis (and intends to pay the relevant APC), the terms of reuse of such Open Access shall be governed by a Creative Commons licence – details of these licences and which [Creative Commons](#) licence will apply to this Work are set out in our licence referred to above.

Other than as permitted in any relevant BMJ Author's Self Archiving Policies, I confirm this Work has not been accepted for publication elsewhere, is not being considered for publication elsewhere and does not duplicate material already published. I confirm all authors consent to publication of this Work and authorise the granting of this licence.

1  
2  
3 **Sex and age differences in clinically significant symptoms of depression and anxiety among people**  
4  
5 **in Australia in the first month of COVID-19 restrictions: A national survey**  
6  
7  
8  
9

10  
11 Karin Hammarberg\*, Thach Tran, Maggie Kirkman, Jane Fisher  
12

13  
14 Global and Women's Health, Public Health and Preventive Medicine, Monash University, Melbourne,  
15  
16 Australia  
17

18  
19 \* **Corresponding author:** Karin Hammarberg, Karin.hammarberg@monash.edu  
20  
21

22  
23  
24  
25 **Competing interests**  
26

27  
28 The authors have no competing interests to declare.  
29  
30

31  
32  
33 **Funding**  
34

35  
36 This work was supported by an untied philanthropic donation from Professor John McBain and Dr  
37  
38 Penny Foster. This funding source had no role in the study design, execution, data analysis or  
39  
40 interpretation of the data.  
41  
42  
43  
44  
45  
46  
47  
48  
49  
50  
51  
52  
53  
54  
55  
56  
57  
58  
59  
60

## Abstract

**Objectives:** To identify sex and age differences in clinically significant symptoms of depression and anxiety and the factors associated with these differences among adults in Australia during COVID-19 related restrictions.

**Design:** Anonymous online survey.

**Setting:** Australia.

**Participants:** Adults aged over 18 years living in Australia were eligible and 13,829 contributed complete data. Of these, 13,762 identified as female (10,434) or male (3,328) and were included in analyses.

**Interventions:** None

**Outcome measures:** Clinically significant symptoms of depression ( $\geq 10$  on Patient Health Questionnaire 9, PHQ-9) or anxiety ( $\geq 10$  on Generalised Anxiety Disorder Scale 7, GAD-7), and experiences of irritability (GAD-7 Item 6).

**Results:** Women were more likely than men to have clinically significant symptoms of depression (26.3% [95% CI 25.4; 27.1] versus 20.1% [95% CI 18.7; 21.5],  $p < 0.001$ ) and anxiety (21.8% [95% CI 21.0; 22.6] versus 14.2% [95% CI 13.0; 15.4],  $p < 0.001$ ) and to have experienced irritability in the previous fortnight (63.1% [95% CI 62.1; 64.0] versus 51.4% [95% CI 49.7; 53.2],  $p < 0.001$ ). They were also more likely than men to be doing unpaid work caring for children (22.8% [95% CI 22.0; 23.6] versus 8.6% [95% CI 7.7; 9.6],  $p < 0.001$ ) and dependent relatives (9.8% [95% CI 9.2; 10.3] versus 5.7% [95% CI 4.9; 6.5],  $p < 0.001$ ) which made significant contributions to the mental health outcomes of interest. Loss of employment, fear of contracting COVID-19, and feeling a severe impact of the restrictions were associated with poorer mental health in women and men of all ages.

**Conclusions:** Rates of clinically significant symptoms of depression and anxiety were higher among women than men. Rather than being intrinsically more vulnerable to mental health problems during

1  
2  
3 the COVID-19 pandemic, the higher risk of symptoms of anxiety and depression among women may  
4  
5 in part be explained by their disproportionate burden of unpaid caregiving.  
6  
7  
8  
9

### 10 11 **Strengths and limitations of this study** 12

- 13  
14 • The first to quantify population prevalence of clinically significant symptoms of depression  
15 and anxiety among adults in Australia in month one of COVID-19 restrictions.  
16  
17
- 18 • Standardised measures of depression and anxiety were used to permit comparisons with  
19 equivalent COVID-19 and non-COVID-19 affected populations.  
20  
21
- 22 • We ascertained sex and age differences in factors contributing to poorer mental health.  
23  
24
- 25 • Almost 75% of respondents were women.  
26  
27
- 28 • As this was a cross-sectional study, causal relationships cannot be established with certainty.  
29  
30  
31  
32  
33  
34  
35  
36  
37  
38  
39  
40  
41  
42  
43  
44  
45  
46  
47  
48  
49  
50  
51  
52  
53  
54  
55  
56  
57  
58  
59  
60

## Introduction

As the World Health Organization declared the Severe Acute Respiratory Syndrome Coronavirus 2 (SARS-CoV-2, resulting in COVID-19) outbreak a pandemic, many countries adopted restrictions on people's movements and activities to limit its spread. In Australia, the first confirmed case of COVID-19 was identified in late January 2020.<sup>1</sup> The spread of the virus was initially slow but upward trends in infection rates and the seriousness of this threat to public health led to the establishment of the National Cabinet, an intergovernmental decision-making forum, to coordinate the national response to the COVID-19 pandemic in Australia.<sup>2</sup> In late March, national lockdown measures were mandated to limit the spread of the virus. They included requirements to stay at home except for a few specified reasons, work from home wherever possible, limit physical proximity, meet online and not in person, avoid visits to residential aged care facilities, limit attendance at weddings to five and at funerals to ten people, cancel interstate and international travel, and close schools and other educational institutions and move to learning from home.

As a result of the restrictions, economic activity stalled and unemployment soared. Concerns expressed by health professionals about the mental health consequences of being confined to home, loss of employment, financial strain, loss of freedom to move, and uncertainty about the future have been widely reported in the media.<sup>3-5</sup> These media reports have focused on the likelihood of the pandemic and its associated restrictions increasing the risk of severe mental illness and rates of suicide. However, the possible implications of the COVID-19 restrictions for psychological wellbeing at a population level have received less attention.

Studies in Australia, the United States, China and the United Kingdom have reported that COVID-19-related restrictions have adversely affected women's mental health more than men's but the potential underlying reasons for this have not been described.<sup>6-10</sup>

1  
2  
3 Experts call for high-quality population-level data on the mental health effects of the COVID-19  
4 pandemic to inform government responses, to mitigate adverse effects, and to prepare for future  
5 national crises.<sup>11</sup> This should include identifying factors that increase the risk of poor mental health  
6 in subgroups of the population.  
7  
8  
9  
10

11  
12 The aim of this component of a larger project was to identify sex and age differences in clinically  
13 significant symptoms of depression and anxiety and the factors associated with these among adults  
14 in Australia during the first month of COVID-19-related restrictions.  
15  
16  
17  
18  
19  
20  
21  
22

### 23 **Method**

24  
25 The research was approved by Monash University Human Research Ethics Committee (2020-24080-  
26 42716).  
27  
28  
29  
30

### 31 ***Patient and Public Involvement***

32  
33 No patient involved.  
34  
35  
36

### 37 ***Design***

38  
39 A short, anonymous online survey of people living in Australia aged at least 18 years was launched  
40 four days after the COVID-19 restrictions were implemented. It included demographic questions;  
41 study-specific, fixed-response-option questions about experiences of COVID-19 and the associated  
42 restrictions; and two widely used standardised psychometric instruments measuring symptoms of  
43 depression and anxiety.  
44  
45  
46  
47  
48  
49

50  
51 A sample size of 3,074 people is required to estimate the prevalence of people (20%) with a mental  
52 health problem (at the precision of 2% taking into account design effect = 2).<sup>12</sup>  
53  
54  
55

56 Detailed information about the design, data source, and procedure have been published.<sup>13</sup>  
57  
58

### 59 ***Socio-demographic questions***

60

1  
2  
3 Study-specific questions were used to ascertain age, area of residence, gender, and living and work  
4  
5 circumstances.

6  
7  
8 Socioeconomic Indices for Areas (SEIFA) were derived from each respondent's postcode using the  
9  
10 most recent Australian Bureau of Statistics data.<sup>14</sup> SEIFA provides measures of socio-economic  
11  
12 conditions by geographic area.

### 13 14 15 ***Experience of COVID 19 and the associated restrictions***

16  
17 Study-specific questions assessed:

- 18  
19  
20  
21 i. Direct experience of COVID-19: whether the respondent had been diagnosed with or tested  
22  
23 for COVID-19, or lived with or knew someone with COVID-19: yes / no.  
24  
25  
26 ii. Whether a job had been lost because of COVID-19 restrictions: yes / no.  
27  
28  
29 iii. Worry about contracting COVID-19: a visual analogue scale with scores from 0 (not at all  
30  
31 worried) to 10 (extremely worried).  
32  
33  
34 iv. How badly COVID-19 restrictions had affected daily life: a visual analogue scale with scores  
35  
36 from 0 (not at all badly) to 10 (very badly).  
37  
38  
39

### 40 41 42 ***Psychological wellbeing***

43  
44 Two standardised psychometric instruments were used to assess symptoms of depression and  
45  
46 generalised anxiety experienced over the previous two weeks.

### 47 48 49 ***Patient Health Questionnaire 9 (PHQ-9)***

50  
51 The PHQ-9<sup>15</sup> is a 9-item scale asking respondents to state how often they have experienced each  
52  
53 depressive symptom in the last fortnight on a four-point scale: 0=Not at all, 1=Several days, 2=More  
54  
55 than half the days, and 3=Nearly every day. Aggregated responses yield a scale indicative of symptom  
56  
57 severity. Formally validated against diagnostic psychiatric interviews, a PHQ-9 score  $\geq 10$  has sensitivity  
58  
59  
60



of 88% and specificity of 88% for Major Depression. PHQ-9 scores of 5-9 represent mild, 10-14 moderate, 15-19 moderately severe, and  $\geq 20$  severe depressive symptoms.

### *Generalised Anxiety Disorder Scale (GAD-7)*

The GAD-7<sup>16</sup> is a 7-item scale assessing common symptoms of anxiety that uses the same response options as PHQ-9. In formal validation against psychiatric interviews, a GAD-7 score  $\geq 10$  has sensitivity of 89% and specificity of 82% to detect Generalised Anxiety Disorder. Scores of 5-9 represent mild, 10-14 moderate, and 15-21 severe anxiety. Higher scores are strongly associated with functional impairment. GAD-7 Item 6 asks whether the respondent is 'Becoming irritable or easily annoyed'.

### **Procedure**

The survey was built in Qualtrics Insight Platform (Qualtrics, Provo, UT). It was available from April 3 to May 2, 2020. A link to the survey was hosted on the Monash University website (<https://www.monash.edu/medicine/living-with-covid-19-restrictions-survey>) and information about it was distributed widely on news and social media platforms including the national broadcaster ABC and Facebook and through organisational and personal networks.

### **Data management and statistical analysis**

The outcomes were whether, in the last fortnight, the respondent had experienced:

1. Clinically significant symptoms of depression: PHQ-9 scores  $\geq 10$ .
2. Clinically significant symptoms of anxiety: GAD-7 scores  $\geq 10$ .
3. Becoming easily annoyed or irritable: GAD 7 item 7 score  $> 0$

The visual analogue scales were categorised into two groups: not at all or none to moderate (0-7) and high ( $\geq 8$ ).

Data were analysed in two stages.

- 1  
2  
3 1. Social-demographic characteristics, experience of COVID 19 and the associated restrictions, and  
4  
5 psychological wellbeing were described separately by women and men. Tests of statistical  
6  
7 significance (chi-square) were conducted to compare characteristics by sex.  
8  
9
- 10  
11  
12 2. Sex and age differences in the factors associated with clinically significant symptoms of depression  
13  
14 and anxiety and becoming easily annoyed or irritable were examined using multiple logistic  
15  
16 regression analyses for each of the four sub-groups (women 18-49 years, women 50 years and  
17  
18 older, men 18-49 years, and men 50 years and older). Multiple logistic regression analyses were  
19  
20 performed for each of the outcomes and included as potential explanatory factors social-  
21  
22 demographic characteristics and experiences of COVID-19.  
23  
24

25  
26 Only complete data were included in analyses, which were conducted using STATA Version 16  
27  
28 (StataCorp., College Station, TX).  
29  
30

## 31 32 33 34 **Results**

35  
36  
37 Of the 15,121 respondents who began the questionnaire, 13,829 (91.5%) contributed complete data.  
38  
39 Of these, 13,762 identified as either female or male and were included in analyses. We excluded  
40  
41 people from the analyses reported in this paper who did not identify as either female or male  
42  
43 because the size of the group (N= 67) was relatively small and, in our opinion, the needs of this  
44  
45 group warrant distinct consideration.  
46  
47

### 48 49 ***Respondent characteristics***

50  
51  
52 Respondents' characteristics are in Table 1. Three quarters of the respondents were women. All age  
53  
54 groups and socioeconomic positions were represented. About one in five respondents were living on  
55  
56 their own. Women were more likely than men to have clinically significant symptoms of depression  
57  
58 and anxiety and to report irritability. They were also more likely to do unpaid work caring for children  
59  
60

1  
2  
3 and dependent relatives. Almost one in ten had lost their job as a result of COVID-19. About one in  
4  
5 seven were highly worried about contracting COVID-19 and one in four perceived that the restrictions  
6  
7 had a highly adverse effect on their lives.  
8  
9

10 [TABLE 1 ABOUT HERE]  
11  
12

### 13 ***Factors associated with mental health outcomes*** 14

15  
16 The factors associated with clinically significant symptoms of depression and anxiety and experiencing  
17  
18 irritability for women and men in two age groups are shown in Tables 2, 3, and 4, respectively. Being  
19  
20 highly worried about contracting COVID-19 and perceiving that the restrictions affected personal life  
21  
22 very badly were associated with all outcomes for both women and men of all ages.  
23  
24

#### 25 *Sex and age differences in factors influencing risk of clinically significant symptoms of depression* 26 27

28  
29 For women and men in both age groups, living with family rather than living on their own or with non-  
30  
31 family members reduced the risk of clinically significant symptoms of depression, and the loss of a job  
32  
33 as a result of COVID-19 increased the risk. Occupying a higher socioeconomic position was protective  
34  
35 for all groups, but this reached statistical significance only for women. Unpaid work caring for children  
36  
37 increased the risk for women aged >50 years and decreased the risk for younger women. The effect  
38  
39 on men of caring for children was not significant. Caring for dependent relatives increased risk for all  
40  
41 except men aged >50 years.  
42  
43  
44

45 [TABLE 2 ABOUT HERE]  
46  
47

#### 48 *Sex and age differences in factors influencing risk of clinically significant symptoms of anxiety* 49 50

51  
52 Living with family was protective for all except for women aged >50 years, for whom it increased the  
53  
54 risk of clinically significant symptoms of anxiety. Unpaid work caring for children also increased the  
55  
56 risk for women aged >50 years but not for younger women or men. Caring for dependent relatives  
57  
58 increased risk for all but men aged <50 years. The loss of a job increased risk for women aged >50  
59  
60 years.

1  
2  
3 [TABLE 3 ABOUT HERE]  
4  
5

6 *Sex and age differences in factors influencing risk of irritability*  
7

8  
9 Living with family increased the risk of reported irritability in women of all ages but not in men. Caring  
10 for children increased risk of irritability in women of all ages and men aged <50 years but not in older  
11 men. Caring for dependent relatives increased risk of irritability in women and men aged >50 years  
12 but not in younger men. The loss of a job increased risk for all but women aged <50 years.  
13  
14  
15  
16  
17

18 [TABLE 4 ABOUT HERE]  
19  
20  
21  
22  
23

24 **Discussion**  
25

26  
27 To date most COVID-19 related research has focused on the physical effects of COVID-19. There is now  
28 growing evidence about the far-reaching mental health consequences of COVID-19 and its associated  
29 government-imposed restrictions. Population-based studies and studies of health care workers and  
30 people with pre-existing mental illness demonstrate the significant impact of COVID-19 on people's  
31 mental health and wellbeing.<sup>17-22</sup> This population-based study adds to existing evidence by identifying  
32 sex and age differences in the mental health consequences of COVID-19 restrictions and associated  
33 factors. While the loss of a job, being very fearful of contracting COVID-19, and experiencing the  
34 restrictions as highly adverse for daily life increased the risk of clinically significant symptoms of  
35 anxiety and depression and of reported irritability in almost all groups, other factors were more likely  
36 to affect the mental health of sub-groups.  
37  
38  
39  
40  
41  
42  
43  
44  
45  
46  
47  
48

49  
50 Strengths of this study include the large sample. Validated measures of symptoms of anxiety and  
51 depression were used and the survey included questions about respondents' experiences of COVID-  
52 19, level of concern about contracting COVID-19, loss of a job due to COVID-19, and how badly COVID-  
53 19 restrictions had affected daily life. However, limitations are also acknowledged. There is clear  
54 evidence that women are more likely than men to participate in research, as they did in this study  
55  
56  
57  
58  
59  
60

1  
2  
3 where a much higher proportion of respondents were women than men.<sup>23</sup> As a result, while we are  
4 confident that the findings accurately reflect the impact of the restrictions on women's mental health,  
5  
6 it is possible that we can be less confident about our understanding of their impact on the mental  
7  
8 health of men. Also, because the proportion of respondents occupying the lowest socioeconomic  
9  
10 position (whose experiences are likely to have been more difficult) was low, it is possible that the  
11  
12 findings might be underestimates of the mental health impacts of the restrictions on the population.  
13  
14  
15 Lastly, the cross-sectional design does not allow causal relationships to be established.  
16  
17

18  
19 The mental health effects of living with family members rather than alone or with non-family members  
20  
21 varied by group. While living with family members was protective against symptoms of depression for  
22  
23 all groups, it increased the risk of anxiety in women >50. Furthermore, it increased the risk of reported  
24  
25 irritability for women of all ages but not for men. A possible explanation for these findings is that, as  
26  
27 a consequence of COVID-19 and its associated restrictions on the economy and labour market, many  
28  
29 young people lost employment and became unable to pay rent and other living expenses and  
30  
31 therefore had to move back to their family home. A recent survey revealed that 26% of households in  
32  
33 Australia have an adult child living at home. Of those households, 21% have an adult child who has  
34  
35 returned home because of COVID-19.<sup>24</sup> The work of re-establishing expectations of how to live  
36  
37 together, negotiating contributions to household tasks, and dealing with adult children's feelings of  
38  
39 frustration may have been largely carried by women which may have contributed to their higher risk  
40  
41 of anxiety and irritability.  
42  
43  
44  
45

46  
47 The unpaid work of caring for children and dependent relatives is disproportionately carried by  
48  
49 women. In 2015 women in Australia did 11.5 hours per week more unpaid labour than men.<sup>25</sup> This  
50  
51 pre-existing gender inequality may have been exacerbated by the COVID-19-related restrictions  
52  
53 during which women reported being much more likely than men to do unpaid work caring for children  
54  
55 and dependent relatives. This study found that caring for dependent relatives contributed significantly  
56  
57 to the risk of symptoms of depression and anxiety and reported irritability in all groups. In response  
58  
59  
60

1  
2  
3 to the pandemic, many services accessed by people with dependent relatives such as special schools,  
4 allied health, and disability services became restricted or unavailable. This may have increased the  
5 burden of caring and contributed to the poorer mental health of people caring for dependent  
6 relatives. Findings were less consistent on the impact on mental health of caring for children. Whereas  
7 this contributed significantly to symptoms of depression and anxiety in women aged >50, in younger  
8 women it reduced the risk of symptoms of depression and it had no effect on the mental health of  
9 men. Younger women are likely to have younger children than older women and they may be easier  
10 to manage at home than adolescents and young adults. Furthermore, the restriction related changes  
11 in the caring responsibilities of women with young dependent children may have been less dramatic  
12 than for those with adolescents or young adult children. The strain of being largely confined to home  
13 and managing the needs and frustrations of adolescents or young adults who have to learn from home  
14 rather than together with peers at school or university might explain the increased risk of symptoms  
15 of depression and anxiety in women aged >50.  
16  
17  
18  
19  
20  
21  
22  
23  
24  
25  
26  
27  
28  
29  
30  
31  
32

33 The findings of this study make a significant contribution to knowledge about the sex- and age-specific  
34 factors that contribute to poor mental health during government-imposed restrictions in response to  
35 the COVID-19 pandemic. They suggest that some factors increase the risk of poor mental health in  
36 women and men of all ages. Others, however, are more likely to affect the mental health of women  
37 and indicate that, rather than being intrinsically more vulnerable to mental health problems during  
38 the COVID-19 pandemic, their higher risk of poor mental health may in part be explained by their  
39 disproportionately large share of the burden of unpaid caring work which increased with the closure  
40 of usual services like schools and disability services. These findings can inform public health strategies  
41 to help at risk groups recover once the restrictions are lifted. We agree with Ho et al. who argue that  
42 COVID-19-related mental health responses need to be coordinated and multi-sectorial and that 'Only  
43 by strengthening the psychological defence can nations continue to fight this long-drawn battle and  
44 secure success for the future.'<sup>26</sup> We also endorse a recent policy brief issued by the United Nations,  
45 which recommends that public health responses to assist in COVID-19 recovery should include rapid  
46  
47  
48  
49  
50  
51  
52  
53  
54  
55  
56  
57  
58  
59  
60

1  
2  
3 implementation of 'a whole-of-society approach to promote, protect, and care for mental health;  
4  
5 ensuring widespread availability of mental health and psychosocial support; and supporting recovery  
6  
7 from COVID-19 by building mental health services for the future'.<sup>27</sup>  
8  
9  
10  
11  
12

### 13 **Data availability**

14  
15  
16 Data are available from the first author ([Karin.hammarberg@monash.edu](mailto:Karin.hammarberg@monash.edu)) upon reasonable request.  
17  
18  
19  
20  
21

### 22 **Authors' contributions**

23  
24  
25 The survey was developed and implemented by the members of the Monash COVID -19 Restrictions  
26  
27 Research Group: Jane Fisher, Thach Tran, Karin Hammarberg, Jayagowri Sastry, Hau Nguyen,  
28  
29 Heather Rowe, Sally Popplestone, Ruby Stocker, Claire Stubber, and Maggie Kirkman.  
30  
31

32  
33 KH, TT, MK and JF contributed to the conceptualisation of the research question and interpretation  
34  
35 of the data. TT analysed the data. KH lead the manuscript writing. TT, MK and JF provided  
36  
37 constructive feedback and approved of the final version.  
38  
39  
40  
41  
42  
43  
44  
45  
46  
47  
48  
49  
50  
51  
52  
53  
54  
55  
56  
57  
58  
59  
60

Table 1 Respondent characteristics (n=13,762)

|                                                                                        | <b>Total<br/>n (%)</b> | <b>Females<br/>n (%)</b> | <b>Males<br/>n (%)</b> | <b>p-value</b> |
|----------------------------------------------------------------------------------------|------------------------|--------------------------|------------------------|----------------|
| <b>Total</b>                                                                           | <b>13762</b>           | <b>10434 (75.8)</b>      | <b>3328 (24.2)</b>     |                |
| <b>Age group</b>                                                                       |                        |                          |                        | < 0.001        |
| 18-29                                                                                  | 1323 (9.6)             | 1033 (9.9)               | 290 (8.7)              |                |
| 30-39                                                                                  | 2275 (16.5)            | 1860 (17.8)              | 415 (12.5)             |                |
| 40-49                                                                                  | 2842 (20.7)            | 2334 (22.4)              | 508 (15.3)             |                |
| 50-59                                                                                  | 3055 (22.2)            | 2309 (22.1)              | 746 (22.4)             |                |
| 60-69                                                                                  | 2825 (20.5)            | 2016 (19.3)              | 809 (24.3)             |                |
| 70 +                                                                                   | 1442 (10.5)            | 882 (8.5)                | 560 (16.8)             |                |
| <b>SEIFA quintiles</b>                                                                 |                        |                          |                        | < 0.001        |
| Quintile 1 (Lowest socio-economic position)                                            | 1086 (7.9)             | 760 (7.3)                | 326 (9.8)              |                |
| Quintile 2                                                                             | 1534 (11.2)            | 1127 (10.8)              | 407 (12.2)             |                |
| Quintile 3                                                                             | 2222 (16.2)            | 1670 (16.0)              | 552 (16.6)             |                |
| Quintile 4                                                                             | 3024 (22.0)            | 2313 (22.2)              | 711 (21.4)             |                |
| Quintile 5 (Highest socio-economic position)                                           | 5896 (42.8)            | 4564 (43.7)              | 1332 (40)              |                |
| <b>Living situation</b>                                                                |                        |                          |                        | < 0.001        |
| On your own                                                                            | 2646 (19.2)            | 2033 (19.5)              | 613 (18.4)             |                |
| With only your partner / your partner and children / adult family members              | 9594 (69.7)            | 7190 (68.9)              | 2404 (72.2)            |                |
| With children and without a partner                                                    | 576 (4.2)              | 527 (5.1)                | 49 (1.5)               |                |
| In a shared house with non-family members / Other                                      | 946 (6.9)              | 684 (6.6)                | 262 (7.9)              |                |
| <b>Doing unpaid work caring for children</b>                                           | 2664 (19.4)            | 2377 (22.8)              | 287 (8.6)              | < 0.001        |
| <b>Doing unpaid work caring for dependent relatives</b>                                | 1205 (8.8)             | 1017 (9.8)               | 188 (5.7)              | < 0.001        |
| <b>Lost job because of COVID-19</b>                                                    | 1241 (9.0)             | 964 (9.2)                | 277 (8.3)              | 0.108          |
| <b>Highly worried about contracting COVID-19 (scale score <math>\geq</math> 8)</b>     | 2167 (15.8)            | 1730 (16.6)              | 437 (13.1)             | < 0.001        |
| <b>High adverse impact of restrictions (scale score <math>\geq</math> 8)</b>           | 3414 (24.8)            | 2661 (25.5)              | 753 (22.6)             | 0.001          |
| <b>Clinically significant symptoms of depression, PHQ-9 score <math>\geq</math> 10</b> | 3408 (24.8)            | 2740 (26.3)              | 668 (20.1)             | < 0.001        |
| <b>Clinically significant symptoms of anxiety, GAD-7 score <math>\geq</math> 10</b>    | 2747 (20.0)            | 2275 (21.8)              | 472 (14.2)             | < 0.001        |
| <b>Becoming easily annoyed or irritable GAD 7 Item 6 &gt; 0</b>                        | 8291 (60.2)            | 6579 (63.1)              | 1712 (51.4)            | < 0.001        |



Table 2 Factors associated with clinically significant symptoms of depression (PHQ-9 scores  $\geq 10$ )

|                                                                                    | Females                  |                          | Males                    |                          |
|------------------------------------------------------------------------------------|--------------------------|--------------------------|--------------------------|--------------------------|
|                                                                                    | 18-49 years old          | 50 years old and above   | 18-49 years old          | 50 years old and above   |
| <b>Living with family vs. not living with family</b>                               | <b>0.63 [0.54; 0.74]</b> | <b>0.71 [0.6; 0.83]</b>  | <b>0.6 [0.45; 0.8]</b>   | <b>0.4 [0.3; 0.53]</b>   |
| <b>SEIFA quintiles</b>                                                             |                          |                          |                          |                          |
| Quintile 1 (Lowest SEP)                                                            |                          |                          |                          |                          |
| Quintile 2                                                                         | 0.8 [0.58; 1.08]         | 0.85 [0.63; 1.16]        | 0.75 [0.39; 1.45]        | 0.82 [0.5; 1.34]         |
| Quintile 3                                                                         | <b>0.66 [0.49; 0.87]</b> | 0.88 [0.66; 1.17]        | 0.96 [0.54; 1.7]         | 0.95 [0.59; 1.52]        |
| Quintile 4                                                                         | 0.78 [0.6; 1.01]         | 0.78 [0.58; 1.03]        | 0.95 [0.55; 1.64]        | 0.85 [0.54; 1.33]        |
| Quintile 5 (Highest SEP)                                                           | <b>0.62 [0.48; 0.8]</b>  | <b>0.71 [0.55; 0.93]</b> | 0.87 [0.52; 1.45]        | 0.7 [0.46; 1.07]         |
|                                                                                    |                          |                          |                          |                          |
| <b>Doing unpaid work caring for children</b>                                       | <b>0.83 [0.72; 0.95]</b> | <b>1.33 [1.05; 1.67]</b> | 1.21 [0.82; 1.78]        | 1.15 [0.66; 2.03]        |
| <b>Doing unpaid work caring for dependent relatives</b>                            | <b>1.52 [1.21; 1.91]</b> | <b>1.55 [1.26; 1.91]</b> | <b>1.8 [1.02; 3.19]</b>  | 1.47 [0.89; 2.44]        |
| <b>Lost job because of COVID-19</b>                                                | <b>1.51 [1.25; 1.82]</b> | <b>1.81 [1.43; 2.28]</b> | <b>1.65 [1.13; 2.41]</b> | <b>1.69 [1.09; 2.62]</b> |
| <b>Highly worried about contracting COVID-19 (scale score <math>\geq 8</math>)</b> | <b>1.77 [1.5; 2.09]</b>  | <b>1.62 [1.37; 1.92]</b> | <b>2.02 [1.34; 3.04]</b> | <b>1.57 [1.14; 2.17]</b> |
| <b>High adverse impact of restrictions (scale score <math>\geq 8</math>)</b>       | <b>3.34 [2.93; 3.81]</b> | <b>2.81 [2.41; 3.28]</b> | <b>2.91 [2.2; 3.84]</b>  | <b>4.36 [3.32; 5.72]</b> |

Table 3 Factors associated with clinically significant symptoms of anxiety (GAD-7 score  $\geq 10$ )

|                                                                                    | Females                  |                          | Males                    |                          |
|------------------------------------------------------------------------------------|--------------------------|--------------------------|--------------------------|--------------------------|
|                                                                                    | 18-49 years old          | 50 years old and above   | 18-49 years old          | 50 years old and above   |
| <b>Living with family vs. not living with family</b>                               | <b>0.83 [0.7; 0.99]</b>  | <b>1.27 [1.05; 1.53]</b> | <b>0.61 [0.44; 0.85]</b> | <b>0.6 [0.43; 0.83]</b>  |
| <b>SEIFA quintiles</b>                                                             |                          |                          |                          |                          |
| Quintile 1 (Lowest SEP)                                                            |                          |                          |                          |                          |
| Quintile 2                                                                         | 0.82 [0.6; 1.14]         | 1.18 [0.82; 1.69]        | 0.81 [0.39; 1.71]        | 0.9 [0.49; 1.67]         |
| Quintile 3                                                                         | <b>0.73 [0.54; 0.97]</b> | 1.13 [0.81; 1.59]        | 1.16 [0.61; 2.19]        | 1.34 [0.76; 2.35]        |
| Quintile 4                                                                         | 0.8 [0.61; 1.05]         | 1.1 [0.79; 1.54]         | 0.99 [0.54; 1.82]        | 1.33 [0.78; 2.27]        |
| Quintile 5 (Highest SEP)                                                           | <b>0.72 [0.56; 0.94]</b> | 1.01 [0.74; 1.38]        | 0.82 [0.46; 1.46]        | 0.92 [0.55; 1.54]        |
|                                                                                    |                          |                          |                          |                          |
| <b>Doing unpaid work caring for children</b>                                       | 0.99 [0.86; 1.14]        | <b>1.34 [1.05; 1.73]</b> | 1.13 [0.73; 1.75]        | 1.07 [0.57; 2.01]        |
| <b>Doing unpaid work caring for dependent relatives</b>                            | <b>1.34 [1.06; 1.69]</b> | <b>1.49 [1.19; 1.87]</b> | 1.5 [0.8; 2.8]           | <b>2.32 [1.38; 3.9]</b>  |
| <b>Lost job because of COVID-19</b>                                                | 1.18 [0.97; 1.44]        | <b>1.56 [1.2; 2.02]</b>  | 1.48 [0.98; 2.24]        | 1.38 [0.83; 2.29]        |
| <b>Highly worried about contracting COVID-19 (scale score <math>\geq 8</math>)</b> | <b>2.49 [2.12; 2.93]</b> | <b>2.44 [2.04; 2.91]</b> | <b>2.91 [1.9; 4.43]</b>  | <b>2.05 [1.45; 2.9]</b>  |
| <b>High adverse impact of restrictions (scale score <math>\geq 8</math>)</b>       | <b>3.03 [2.65; 3.47]</b> | <b>3.13 [2.64; 3.7]</b>  | <b>3.17 [2.34; 4.29]</b> | <b>4.52 [3.31; 6.16]</b> |

Table 4 Factors associated with irritability (GAD-7 item 6 score &gt;0)

|                                                                       | Females                  |                          | Males                    |                          |
|-----------------------------------------------------------------------|--------------------------|--------------------------|--------------------------|--------------------------|
|                                                                       | 18-49 years old          | 50 years old and above   | 18-49 years old          | 50 years old and above   |
| <b>Living with family vs. not living with family</b>                  | <b>1.24 [1.05; 1.47]</b> | <b>1.57 [1.39; 1.78]</b> | 1.2 [0.91; 1.59]         | 1.07 [0.86; 1.32]        |
| <b>SEIFA quintiles</b>                                                |                          |                          |                          |                          |
| Quintile 1 (Lowest SEP)                                               |                          |                          |                          |                          |
| Quintile 2                                                            | 0.99 [0.7; 1.41]         | 1 [0.78; 1.28]           | 0.59 [0.32; 1.11]        | 0.91 [0.64; 1.29]        |
| Quintile 3                                                            | 0.83 [0.61; 1.14]        | 0.95 [0.75; 1.2]         | 0.76 [0.43; 1.33]        | 1.06 [0.76; 1.5]         |
| Quintile 4                                                            | 0.95 [0.71; 1.28]        | 1.08 [0.86; 1.36]        | 0.81 [0.47; 1.39]        | 1.05 [0.76; 1.46]        |
| Quintile 5 (Highest SEP)                                              | 0.97 [0.73; 1.29]        | 0.99 [0.81; 1.23]        | 0.84 [0.51; 1.4]         | 1.09 [0.81; 1.48]        |
|                                                                       |                          |                          |                          |                          |
| <b>Doing unpaid work caring for children</b>                          | <b>1.84 [1.58; 2.14]</b> | <b>1.37 [1.13; 1.67]</b> | <b>1.81 [1.21; 2.7]</b>  | 1.05 [0.71; 1.55]        |
| <b>Doing unpaid work caring for dependent relatives</b>               | <b>1.42 [1.07; 1.89]</b> | <b>1.44 [1.21; 1.72]</b> | 0.99 [0.54; 1.82]        | <b>1.69 [1.16; 2.47]</b> |
| <b>Lost job because of COVID-19</b>                                   | 1.18 [0.94; 1.47]        | <b>1.28 [1.04; 1.59]</b> | <b>1.63 [1.07; 2.49]</b> | <b>1.52 [1.05; 2.19]</b> |
| <b>Highly worried about contracting COVID-19</b><br>(scale score ≥ 8) | <b>1.44 [1.18; 1.77]</b> | <b>1.43 [1.23; 1.65]</b> | <b>2.39 [1.45; 3.94]</b> | <b>1.49 [1.16; 1.91]</b> |
| <b>High adverse impact of restrictions</b> (scale score ≥ 8)          | <b>2.33 [1.96; 2.77]</b> | <b>1.84 [1.6; 2.1]</b>   | <b>2.35 [1.72; 3.22]</b> | <b>2.74 [2.19; 3.43]</b> |

## References

1. Australian Government. First confirmed case of novel coronavirus in Australia,  
<https://www.health.gov.au/ministers/the-hon-greg-hunt-mp/media/first-confirmed-case-of-novel-coronavirus-in-australia>
2. Menzies J. Explainer: what is the national cabinet and is it democratic?,  
<https://theconversation.com/explainer-what-is-the-national-cabinet-and-is-it-democratic-135036>
3. Mannix L. <https://www.smh.com.au/national/what-impact-could-the-lockdown-have-on-our-mental-health-20200409-p54inz.html>. *Sydney Morning Herald* April 9, 2020.
4. Noyes J. <https://www.smh.com.au/national/australia-urged-to-plan-for-coronavirus-mental-illness-wave-20200428-p54nwo.html>. *Sydney Morning Herald* April 29, 2020.
5. Bartone T, Hickie I, McGorry P. <https://ama.com.au/media/joint-statement-covid-19-impact-likely-lead-increased-rates-suicide-and-mental-illness> Australian Medical Association, May 9, 2020.
6. Adams-Prassl A, Boneva T, Golin M, et al. The Impact of the Coronavirus Lockdown on Mental Health: Evidence from the US. Working Papers 2020-030: Human Capital and Economic Opportunity Working Group, 2020.
7. Hamel L, Lopes L, Muñana C, et al. KFF Coronavirus Poll: March 2020.  
<https://www.kff.org/coronavirus-covid-19/poll-finding/kff-coronavirus-poll-march-2020/>
8. Ipsos MORI. <https://www.ipsos.com/ipsos-mori/en-uk/6-10-women-finding-it-harder-stay-positive-day-day-due-coronavirus>.
9. Australian Bureau of Statistics. 4940.0 - Household Impacts of COVID-19 Survey, 14-17 Apr 2020,  
<https://www.abs.gov.au/AUSSTATS/abs@.nsf/allprimarymainfeatures/86FF043DD0C1A1B8CA25856B0081D6F7?opendocument>

- 1  
2  
3 10. Liu N, Zhang F, Wei C, et al. Prevalence and predictors of PTSS during COVID-19 outbreak in China  
4  
5 hardest-hit areas: Gender differences matter. *Psychiatry Res* 2020;287:112921-21. doi:  
6  
7 10.1016/j.psychres.2020.112921 [published Online First: 03/16]  
8  
9
- 10 11. Holmes EA, O'Connor RC, Perry VH, et al. Multidisciplinary research priorities for the COVID-19  
11  
12 pandemic: a call for action for mental health science. *Lancet Psychiatry* 2020;7(6):547-60.  
13  
14 doi: 10.1016/s2215-0366(20)30168-1  
15
- 16 12. StataCorp. Stata power, precision, and sample size reference manual. Release 16. College  
17  
18 Station, TX: StataCorp LLC, 2019  
19
- 20 21 13. Fisher J, Tran T, Hammarberg K, et al. Mental health of people in Australia in the first month of  
22  
23 COVID-19 restrictions: a national survey. *Med J Aust* 2020;  
24  
25 [https://www.mja.com.au/journal/2020/mental-health-people-australia-first-month-covid-](https://www.mja.com.au/journal/2020/mental-health-people-australia-first-month-covid-19-restrictions-national-survey)  
26  
27 [19-restrictions-national-survey](https://www.mja.com.au/journal/2020/mental-health-people-australia-first-month-covid-19-restrictions-national-survey)  
28  
29
- 30 14. Australian Bureau of Statistics. <http://www.abs.gov.au/websitedbs/censushome.nsf/home/seifa>  
31
- 32 15. Kroenke K, Spitzer RL, Williams JB. The PHQ-9: validity of a brief depression severity measure. *J*  
33  
34 *Gen Intern Med* 2001;16(9):606-13. doi: 10.1046/j.1525-1497.2001.016009606.x  
35
- 36 16. Spitzer RL, Kroenke K, Williams JBW, et al. A Brief Measure for Assessing Generalized Anxiety  
37  
38 Disorder: The GAD-7. *Arch Intern Med* 2006;166(10):1092-97. doi:  
39  
40 10.1001/archinte.166.10.1092  
41  
42
- 43 17. Chew NWS, Lee GKH, Tan BYQ, et al. A multinational, multicentre study on the psychological  
44  
45 outcomes and associated physical symptoms amongst healthcare workers during COVID-19  
46  
47 outbreak. *Brain Behav Immun* 2020;88:559-65. doi: 10.1016/j.bbi.2020.04.049  
48  
49
- 50 18. Hao F, Tan W, Jiang L, et al. Do psychiatric patients experience more psychiatric symptoms during  
51  
52 COVID-19 pandemic and lockdown? A case-control study with service and research  
53  
54 implications for immunopsychiatry. *Brain Behav Immun* 2020;87:100-06. doi:  
55  
56 10.1016/j.bbi.2020.04.069  
57  
58  
59  
60

- 1  
2  
3 19. Ozamiz-Etxebarria N, Dosil-Santamaria M, Picaza-Gorrochategui M, et al. Stress, anxiety, and  
4  
5 depression levels in the initial stage of the COVID-19 outbreak in a population sample in the  
6  
7 northern Spain. *Cad Saude Publica* 2020;36(4):e00054020. doi: 10.1590/0102-311x00054020  
8  
9
- 10 20. Ozamiz-Etxebarria N, Idoiaga Mondragon N, Dosil Santamaría M, et al. Psychological Symptoms  
11  
12 During the Two Stages of Lockdown in Response to the COVID-19 Outbreak: An Investigation  
13  
14 in a Sample of Citizens in Northern Spain. *Front Psychol* 2020;11:1491-91. doi:  
15  
16 10.3389/fpsyg.2020.01491  
17  
18
- 19 21. Wang C, Pan R, Wan X, et al. Immediate Psychological Responses and Associated Factors during  
20  
21 the Initial Stage of the 2019 Coronavirus Disease (COVID-19) Epidemic among the General  
22  
23 Population in China. *Int J Environ Res Public Health* 2020;17(5):1729. doi:  
24  
25 10.3390/ijerph17051729  
26  
27
- 28 22. Wang C, Pan R, Wan X, et al. A longitudinal study on the mental health of general population  
29  
30 during the COVID-19 epidemic in China. *Brain Behav Immun* 2020;87:40-48. doi:  
31  
32 10.1016/j.bbi.2020.04.028  
33  
34
- 35 23. Galea S, Tracy M. Participation rates in epidemiologic studies. *Ann Epidemiol* 2007;17(9):643-53.  
36  
37 doi: 10.1016/j.annepidem.2007.03.013  
38
- 39 24. Browne K. [https://www.finder.com.au/press-release-may-2020-boomeranging-generation-](https://www.finder.com.au/press-release-may-2020-boomeranging-generation-moves-home-due-to-covid-19)  
40  
41 [moves-home-due-to-covid-19](https://www.finder.com.au/press-release-may-2020-boomeranging-generation-moves-home-due-to-covid-19)  
42
- 43 25. Australian Government Department of Education Skills and Employment.  
44  
45 [https://www.employment.gov.au/newsroom/how-we-share-unpaid-labour-home-informs-](https://www.employment.gov.au/newsroom/how-we-share-unpaid-labour-home-informs-employment-policy)  
46  
47 [employment-policy](https://www.employment.gov.au/newsroom/how-we-share-unpaid-labour-home-informs-employment-policy)  
48  
49
- 50 26. Ho CS, Chee CY, Ho RC. Mental Health Strategies to Combat the Psychological Impact of COVID-  
51  
52 19 Beyond Paranoia and Panic. *Ann Acad Med Singap* 2020;49(3):155-60.  
53
- 54 27. United Nations. Policy Brief: COVID-19 and the Need for Action on Mental Health,  
55  
56 [https://www.un.org/sites/un2.un.org/files/un\\_policy\\_brief-](https://www.un.org/sites/un2.un.org/files/un_policy_brief-covid_and_mental_health_final.pdf)  
57  
58 [covid\\_and\\_mental\\_health\\_final.pdf](https://www.un.org/sites/un2.un.org/files/un_policy_brief-covid_and_mental_health_final.pdf)  
59  
60

## Default Question Block

# HOW ARE YOU?

## Living With COVID-19 Restrictions in Australia

\*\*\*

To help our governments and the community to understand what life is like during the COVID-19 restrictions, we want as many people as possible to complete this snapshot survey.

This survey is anonymous. We can't know who you are.

We would like to hear from you if you are 18 or older and live in Australia!

It will take only about 10 minutes to answer the questions.

If you want to find out more about the survey before you begin, please click [here](#) for more information.

To begin the survey, please click "NEXT PAGE".

Are you living in Australia?

Yes

For peer review only - <http://bmjopen.bmj.com/site/about/guidelines.xhtml>

1  
2  
3  
4  
5  
6  
7  
8  
9  
10  
11  
12  
13  
14  
15  
16  
17  
18  
19  
20  
21  
22  
23  
24  
25  
26  
27  
28  
29  
30  
31  
32  
33  
34  
35  
36  
37  
38  
39  
40  
41  
42  
43  
44  
45  
46  
47  
48  
49  
50  
51  
52  
53  
54  
55  
56  
57  
58  
59  
60

No

Are you above 17 years of age?

Yes

No

**The first group of questions asks about you and your situation**

1. How old are you? (years)

2. Do you live:

- On your own
- With only your partner
- With your partner and children
- With children and without a partner
- With adult family members
- In a shared house with non-family members
- Other (please specify)

3. What is your postcode?

4. Are you:

- Female
- Male
- Other



1  
2  
3  
4  
5  
6  
7  
8  
9  
10  
11  
12  
13  
14  
15  
16  
17  
18  
19  
20  
21  
22  
23  
24  
25  
26  
27  
28  
29  
30  
31  
32  
33  
34  
35  
36  
37  
38  
39  
40  
41  
42  
43  
44  
45  
46  
47  
48  
49  
50  
51  
52  
53  
54  
55  
56  
57  
58  
59  
60

## 5. Were you born in Australia?

Yes

No

### The next set of questions asks about your experience of COVID-19 infection

## 6. To what extent have you experienced COVID-19?

Yes

No

I have been treated in hospital for COVID-19

I have had COVID-19 but did not have to go to hospital

I have been tested for COVID-19

Someone who lives with me has COVID-19

Someone I know who doesn't live with me has COVID-19

## 7. How worried are you that you will catch COVID-19?

Not at all worried

Extremely worried

0

1

2

3

4

5

6

7

8

9

10

## 8. What is your situation at the moment?

Yes

No

I have a job and am working from home

I have a job that I need to leave home to do

I am doing unpaid work caring for children

Yes

No

1 I am doing unpaid  
2 work caring for  
3 dependent relatives

5 I have lost my job  
6 because of COVID-19

8 I was unemployed  
9 before COVID-19

11 I am retired

13 I am a student and  
14 my course is  
15 delivered online

17 I am a student but my  
18 course has been  
19 suspended

21 My main source of  
22 income is government  
23 benefits

## 9. Since COVID-19 I am drinking alcohol:

- 30  More than I used to  
31  
32  Less than I used to  
33  
34  About the same  
35  
36  I don't drink alcohol  
37

## The next set of questions is about your health in general

### 10. Have you been able to get the care you need for non-COVID-19 health conditions or a disability?

- 47  Yes; there's been no change in my health or disability care  
48  
49  Yes; my health or disability care has been better  
50  
51  No; my health or disability care has been worse  
52  
53  I haven't needed health or disability care  
54

## The next set of questions is about how you have felt in the last two weeks

1 11. Over the last 2 weeks, how often have you been bothered by any of the following  
2 problems?  
3

|                                                                                                                                                                                                                               | Not at all            | Several days          | More than half<br>the days | Nearly every<br>day   |
|-------------------------------------------------------------------------------------------------------------------------------------------------------------------------------------------------------------------------------|-----------------------|-----------------------|----------------------------|-----------------------|
| 4 a. Little interest or<br>5 pleasure in doing<br>6 things                                                                                                                                                                    | <input type="radio"/> | <input type="radio"/> | <input type="radio"/>      | <input type="radio"/> |
| 7 b. Feeling down,<br>8 depressed, or<br>9 hopeless                                                                                                                                                                           | <input type="radio"/> | <input type="radio"/> | <input type="radio"/>      | <input type="radio"/> |
| 10 c. Trouble falling or<br>11 staying asleep, or<br>12 sleeping too much                                                                                                                                                     | <input type="radio"/> | <input type="radio"/> | <input type="radio"/>      | <input type="radio"/> |
| 13 d. Feeling tired or<br>14 having little energy                                                                                                                                                                             | <input type="radio"/> | <input type="radio"/> | <input type="radio"/>      | <input type="radio"/> |
| 15 e. Poor appetite or<br>16 overeating                                                                                                                                                                                       | <input type="radio"/> | <input type="radio"/> | <input type="radio"/>      | <input type="radio"/> |
| 17 f. Feeling bad about<br>18 yourself, or that you<br>19 are a failure, or have<br>20 let yourself or your<br>21 family down                                                                                                 | <input type="radio"/> | <input type="radio"/> | <input type="radio"/>      | <input type="radio"/> |
| 22 g. Trouble<br>23 concentrating on<br>24 things, such as<br>25 reading the<br>26 newspaper or<br>27 watching television                                                                                                     | <input type="radio"/> | <input type="radio"/> | <input type="radio"/>      | <input type="radio"/> |
| 28 h. Moving or<br>29 speaking so slowly<br>30 that other people<br>31 could have noticed.<br>32 Or the opposite,<br>33 being so fidgety or<br>34 restless that you have<br>35 been moving around<br>36 a lot more than usual | <input type="radio"/> | <input type="radio"/> | <input type="radio"/>      | <input type="radio"/> |
| 37 i. Thoughts that you<br>38 would be better off<br>39 dead, or of hurting<br>40 yourself in some way                                                                                                                        | <input type="radio"/> | <input type="radio"/> | <input type="radio"/>      | <input type="radio"/> |

41 12. Over the last 2 weeks, how often have you been bothered by any of the following  
42 problems?  
43  
44  
45  
46  
47  
48  
49  
50  
51  
52  
53  
54  
55  
56  
57

|    | Not at all | Several days | More than half the days | Nearly every day |
|----|------------|--------------|-------------------------|------------------|
| 1  |            |              |                         |                  |
| 2  |            |              |                         |                  |
| 3  |            |              |                         |                  |
| 4  |            |              |                         |                  |
| 5  |            |              |                         |                  |
| 6  |            |              |                         |                  |
| 7  |            |              |                         |                  |
| 8  |            |              |                         |                  |
| 9  |            |              |                         |                  |
| 10 |            |              |                         |                  |
| 11 |            |              |                         |                  |
| 12 |            |              |                         |                  |
| 13 |            |              |                         |                  |
| 14 |            |              |                         |                  |
| 15 |            |              |                         |                  |
| 16 |            |              |                         |                  |
| 17 |            |              |                         |                  |
| 18 |            |              |                         |                  |
| 19 |            |              |                         |                  |
| 20 |            |              |                         |                  |
| 21 |            |              |                         |                  |
| 22 |            |              |                         |                  |
| 23 |            |              |                         |                  |
| 24 |            |              |                         |                  |
| 25 |            |              |                         |                  |
| 26 |            |              |                         |                  |
| 27 |            |              |                         |                  |
| 28 |            |              |                         |                  |
| 29 |            |              |                         |                  |
| 30 |            |              |                         |                  |
| 31 |            |              |                         |                  |
| 32 |            |              |                         |                  |
| 33 |            |              |                         |                  |
| 34 |            |              |                         |                  |
| 35 |            |              |                         |                  |
| 36 |            |              |                         |                  |
| 37 |            |              |                         |                  |
| 38 |            |              |                         |                  |
| 39 |            |              |                         |                  |
| 40 |            |              |                         |                  |
| 41 |            |              |                         |                  |
| 42 |            |              |                         |                  |
| 43 |            |              |                         |                  |
| 44 |            |              |                         |                  |
| 45 |            |              |                         |                  |
| 46 |            |              |                         |                  |
| 47 |            |              |                         |                  |
| 48 |            |              |                         |                  |
| 49 |            |              |                         |                  |
| 50 |            |              |                         |                  |
| 51 |            |              |                         |                  |
| 52 |            |              |                         |                  |
| 53 |            |              |                         |                  |
| 54 |            |              |                         |                  |
| 55 |            |              |                         |                  |
| 56 |            |              |                         |                  |
| 57 |            |              |                         |                  |
| 58 |            |              |                         |                  |
| 59 |            |              |                         |                  |
| 60 |            |              |                         |                  |

**The last set of questions is about the impact of COVID-19 on your life:**

13. Please tell us up to three bad things that have happened to you because of the COVID-19 restrictions

Bad thing 1:

Bad thing 2:

Bad thing 3:

14. Please tell us up to three good things that have happened to you because of the COVID-19 restrictions

1 Good thing 1:  
2  
3  
4  
5  
6  
7

8 Good thing 2:  
9  
10  
11  
12  
13  
14

15 Good thing 3:  
16  
17  
18  
19  
20  
21

22 15. Please tell us in general how optimistic you feel about the future  
23

24 Not at all optimistic

Extremely optimistic

25  
26 0  1  2  3  4  5  6  7  8  9  10

27  
28  
29  
30  
31 16. Please write anything else you would like us to know about your experience of  
32 COVID-19 (up to 250 characters)  
33  
34

35  
36  
37  
38  
39  
40  
41  
42  
43 Thank you for completing the survey. Please encourage other people to complete it by sending  
44 this link: **[https://monash.az1.qualtrics.com/jfe/form/SV\\_dpqJqBdgFclvpyJ](https://monash.az1.qualtrics.com/jfe/form/SV_dpqJqBdgFclvpyJ)**

45  
46  
47  
48 We will give the results to governments and other organisations to help them understand what  
49 people need now and to prepare for similar circumstances in the future.  
50

51  
52  
53 You can see the survey results in a few weeks at [\[WEBSITE\]](#)

54  
55  
56 If you are feeling distressed, there are places you can contact for help:  
57  
58  
59

60 *Your GP*

*Beyond blue: [beyondblue.org.au](http://beyondblue.org.au)*

*For advice and information, go to: Government of Australia: [www.australia.gov.au](http://www.australia.gov.au)*

For peer review only - <http://bmjopen.bmj.com/site/about/guidelines.xhtml>

1  
2  
3  
4  
5  
6  
7  
8  
9  
10  
11  
12  
13  
14  
15  
16  
17  
18  
19  
20  
21  
22  
23  
24  
25  
26  
27  
28  
29  
30  
31  
32  
33  
34  
35  
36  
37  
38  
39  
40  
41  
42  
43  
44  
45  
46  
47  
48  
49  
50  
51  
52  
53  
54  
55  
56  
57  
58  
59  
60

Powered by Qualtrics

STROBE Statement—Checklist of items that should be included in reports of *cross-sectional studies*

|                              | Item No | Recommendation                                                                                                                                                                                               | Page            |
|------------------------------|---------|--------------------------------------------------------------------------------------------------------------------------------------------------------------------------------------------------------------|-----------------|
| <b>Title and abstract</b>    | 1       | (a) Indicate the study's design with a commonly used term in the title or the abstract                                                                                                                       | p 1             |
|                              |         | (b) Provide in the abstract an informative and balanced summary of what was done and what was found                                                                                                          | p 2             |
| <b>Introduction</b>          |         |                                                                                                                                                                                                              |                 |
| Background/rationale         | 2       | Explain the scientific background and rationale for the investigation being reported                                                                                                                         | p 4-5           |
| Objectives                   | 3       | State specific objectives, including any prespecified hypotheses                                                                                                                                             | p 5             |
| <b>Methods</b>               |         |                                                                                                                                                                                                              |                 |
| Study design                 | 4       | Present key elements of study design early in the paper                                                                                                                                                      | p 5             |
| Setting                      | 5       | Describe the setting, locations, and relevant dates, including periods of recruitment, exposure, follow-up, and data collection                                                                              | p 5-7           |
| Participants                 | 6       | (a) Give the eligibility criteria, and the sources and methods of selection of participants                                                                                                                  | p 5             |
| Variables                    | 7       | Clearly define all outcomes, exposures, predictors, potential confounders, and effect modifiers. Give diagnostic criteria, if applicable                                                                     | p 5-7           |
| Data sources/<br>measurement | 8*      | For each variable of interest, give sources of data and details of methods of assessment (measurement). Describe comparability of assessment methods if there is more than one group                         | p 5-7           |
| Bias                         | 9       | Describe any efforts to address potential sources of bias                                                                                                                                                    | p 5             |
| Study size                   | 10      | Explain how the study size was arrived at                                                                                                                                                                    | p 5             |
| Quantitative variables       | 11      | Explain how quantitative variables were handled in the analyses. If applicable, describe which groupings were chosen and why                                                                                 | p 7-8           |
| Statistical methods          | 12      | (a) Describe all statistical methods, including those used to control for confounding                                                                                                                        | 7-8             |
|                              |         | (b) Describe any methods used to examine subgroups and interactions                                                                                                                                          | p 7-8           |
|                              |         | (c) Explain how missing data were addressed                                                                                                                                                                  | p 8             |
|                              |         | (d) If applicable, describe analytical methods taking account of sampling strategy                                                                                                                           | N/A             |
|                              |         | (e) Describe any sensitivity analyses                                                                                                                                                                        | N/A             |
| <b>Results</b>               |         |                                                                                                                                                                                                              |                 |
| Participants                 | 13*     | (a) Report numbers of individuals at each stage of study—eg numbers potentially eligible, examined for eligibility, confirmed eligible, included in the study, completing follow-up, and analysed            | p 8             |
|                              |         | (b) Give reasons for non-participation at each stage                                                                                                                                                         | N/A             |
|                              |         | (c) Consider use of a flow diagram                                                                                                                                                                           |                 |
| Descriptive data             | 14*     | (a) Give characteristics of study participants (eg demographic, clinical, social) and information on exposures and potential confounders                                                                     | p 8 and Table 1 |
|                              |         | (b) Indicate number of participants with missing data for each variable of interest <i>Only surveys with complete data were included in analysis</i>                                                         |                 |
| Outcome data                 | 15*     | Report numbers of outcome events or summary measures                                                                                                                                                         | p 9-10          |
| Main results                 | 16      | (a) Give unadjusted estimates and, if applicable, confounder-adjusted estimates and their precision (eg, 95% confidence interval). Make clear which confounders were adjusted for and why they were included | Tables 2-4      |

|                          |    |                                                                                                                                                                            |           |
|--------------------------|----|----------------------------------------------------------------------------------------------------------------------------------------------------------------------------|-----------|
|                          |    | (b) Report category boundaries when continuous variables were categorized                                                                                                  | Table 2-4 |
|                          |    | (c) If relevant, consider translating estimates of relative risk into absolute risk for a meaningful time period                                                           | N/A       |
| Other analyses           | 17 | Report other analyses done—eg analyses of subgroups and interactions, and sensitivity analyses                                                                             | N/A       |
| <b>Discussion</b>        |    |                                                                                                                                                                            |           |
| Key results              | 18 | Summarise key results with reference to study objectives                                                                                                                   | p 10-12   |
| Limitations              | 19 | Discuss limitations of the study, taking into account sources of potential bias or imprecision. Discuss both direction and magnitude of any potential bias                 | p 10      |
| Interpretation           | 20 | Give a cautious overall interpretation of results considering objectives, limitations, multiplicity of analyses, results from similar studies, and other relevant evidence | p 10-12   |
| Generalisability         | 21 | Discuss the generalisability (external validity) of the study results                                                                                                      | p 11-12   |
| <b>Other information</b> |    |                                                                                                                                                                            |           |
| Funding                  | 22 | Give the source of funding and the role of the funders for the present study and, if applicable, for the original study on which the present article is based              | p 1       |

\*Give information separately for exposed and unexposed groups.

**Note:** An Explanation and Elaboration article discusses each checklist item and gives methodological background and published examples of transparent reporting. The STROBE checklist is best used in conjunction with this article (freely available on the Web sites of PLoS Medicine at <http://www.plosmedicine.org/>, Annals of Internal Medicine at <http://www.annals.org/>, and Epidemiology at <http://www.epidem.com/>). Information on the STROBE Initiative is available at [www.strobe-statement.org](http://www.strobe-statement.org).
